# Supplementary figures and images for: Stabilized Wittig olefination for bioconjugation
Source: Royal Society of Chemistry journal article supplement (doi:10.1039/c3cc45961f), 2013-01-01

### Stabilized Wittig Olefination for Bioconjugation – <sup>1</sup>H and <sup>13</sup>C NMR Spectra

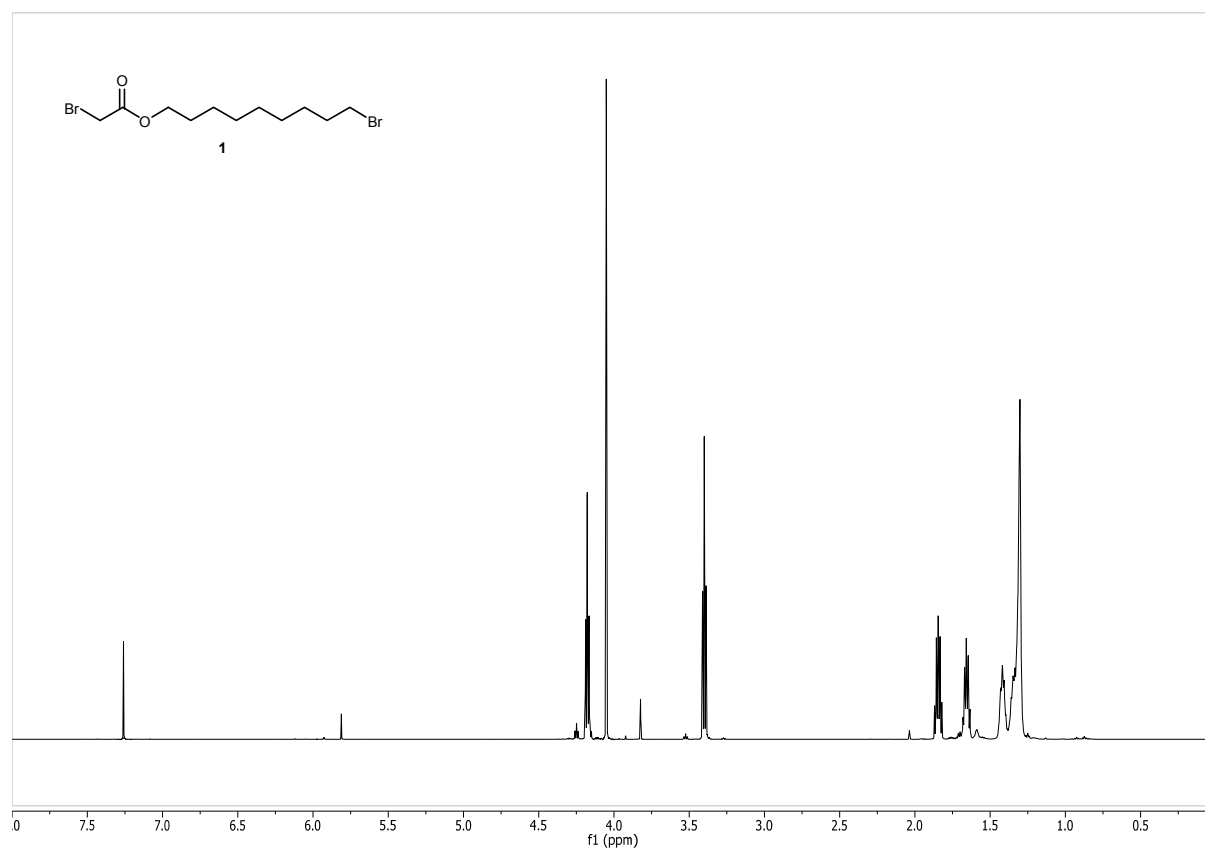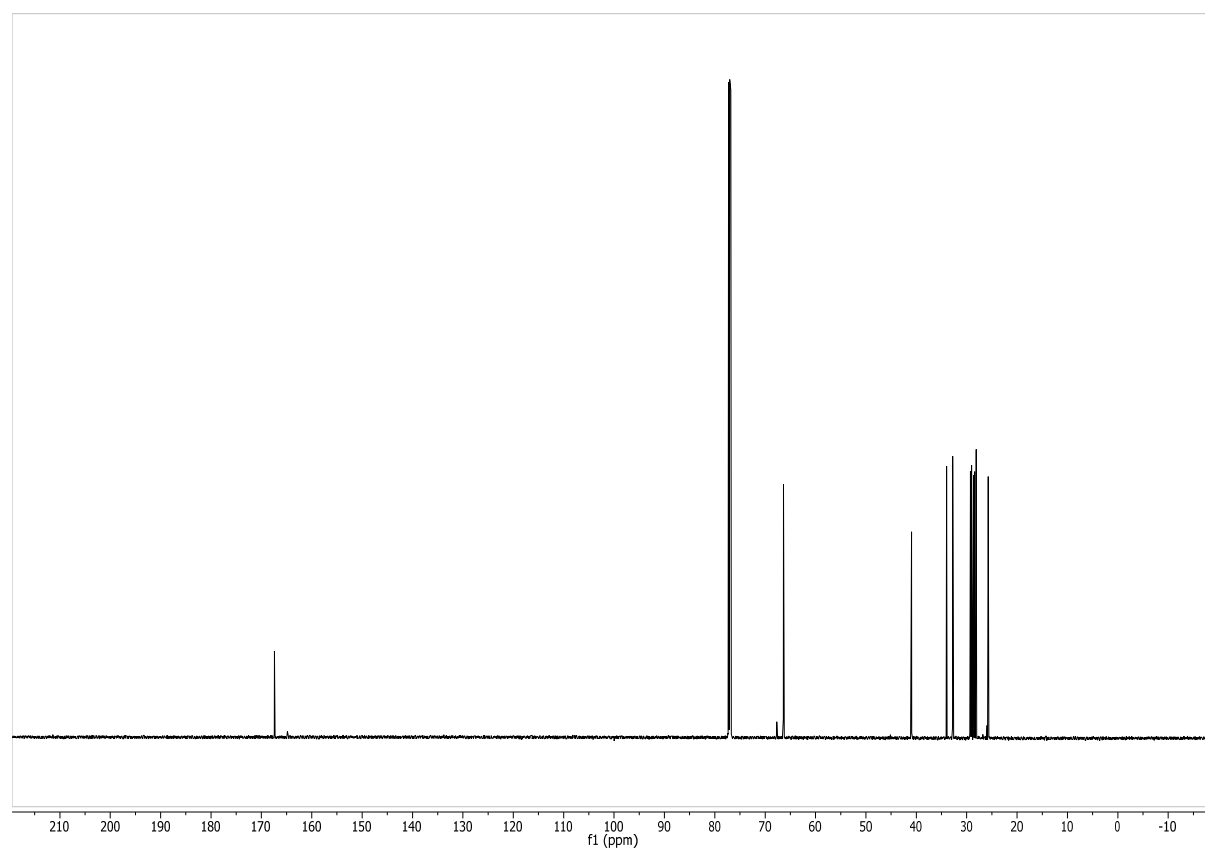

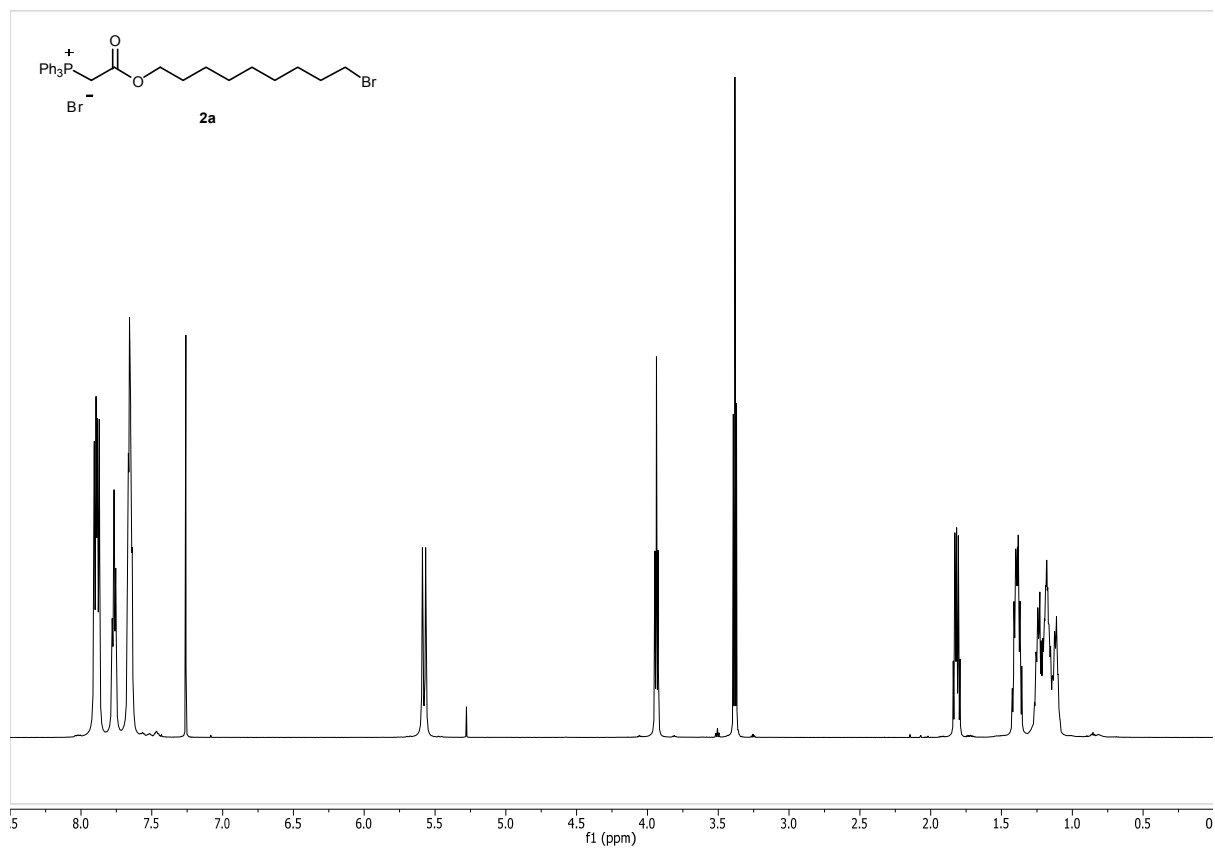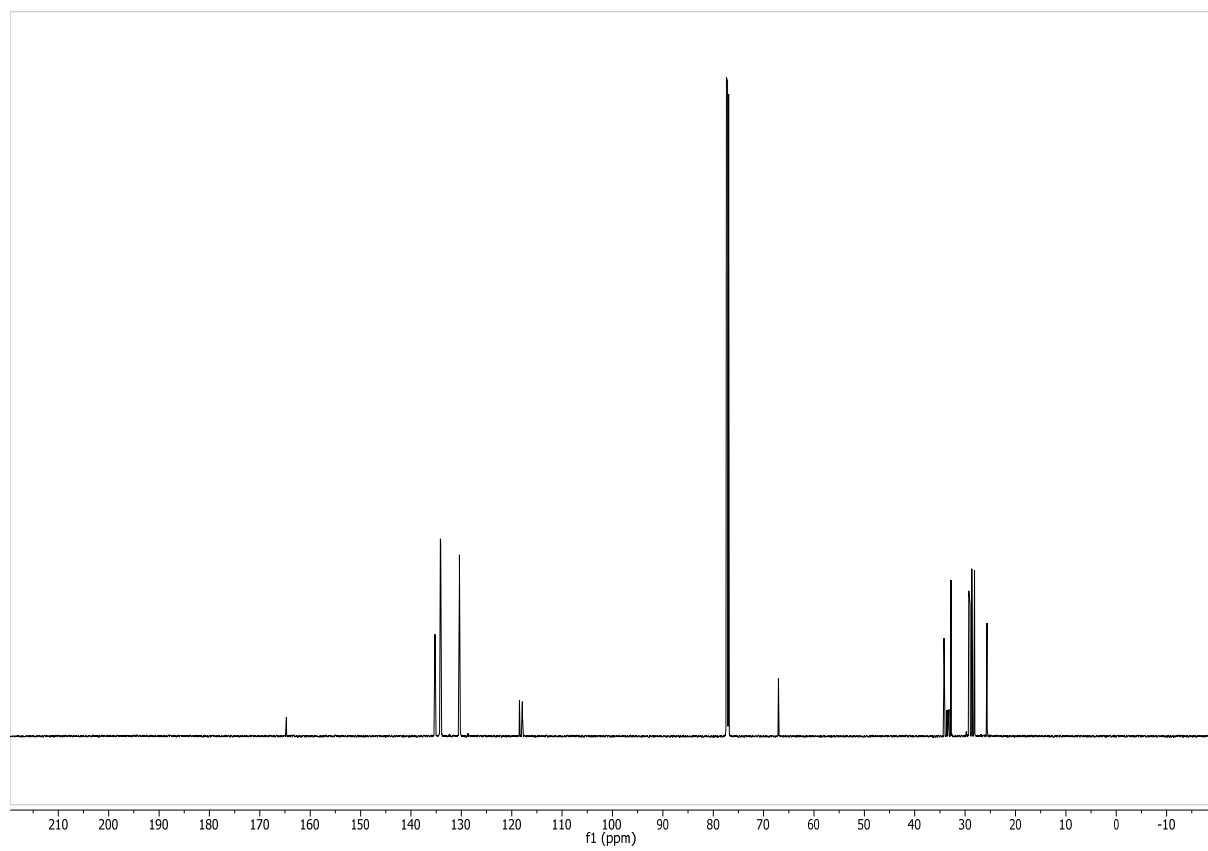

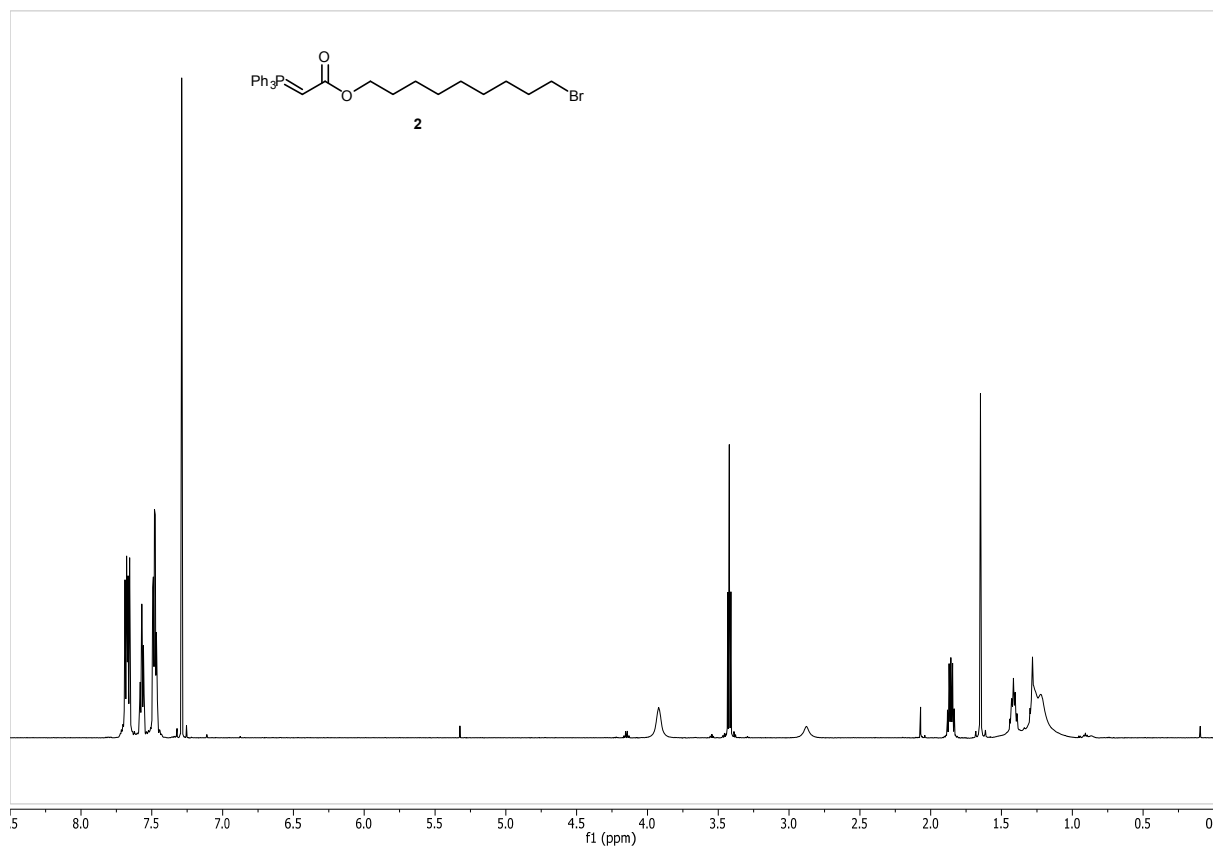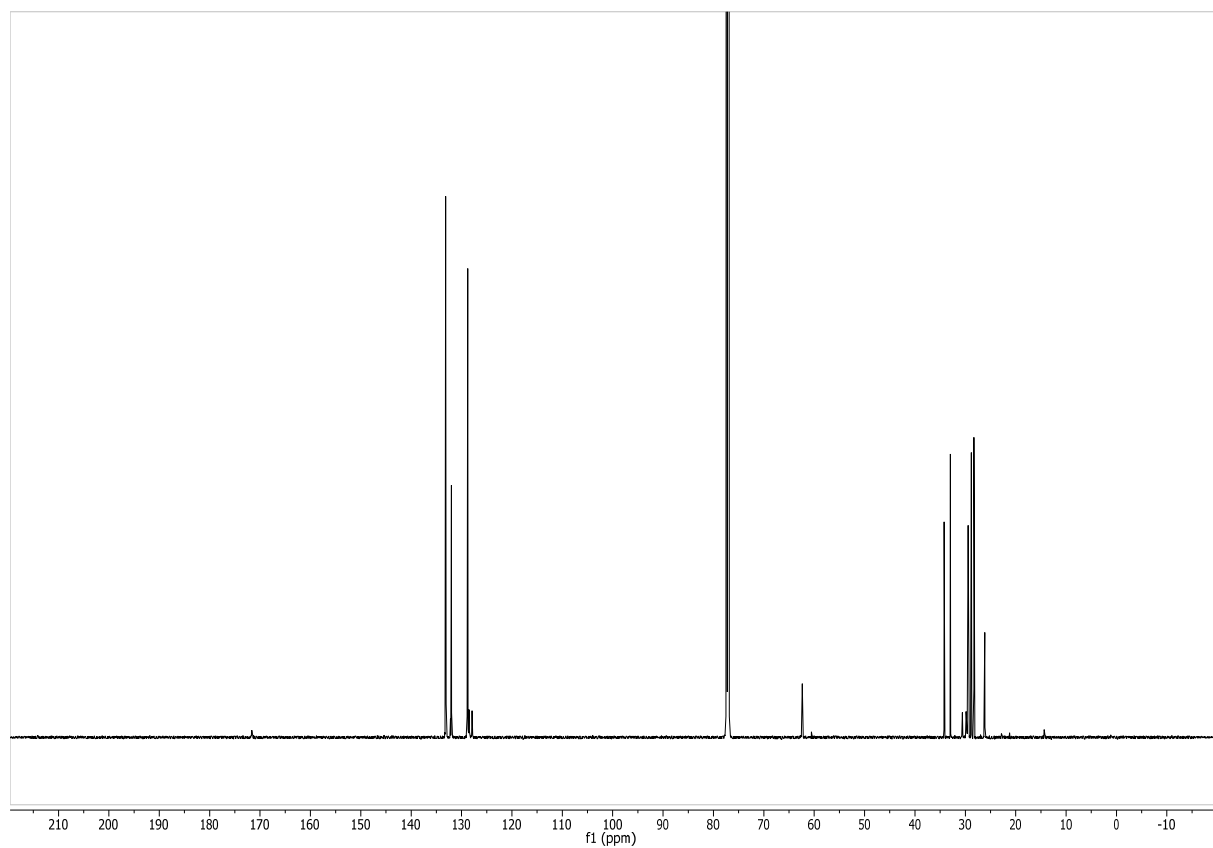

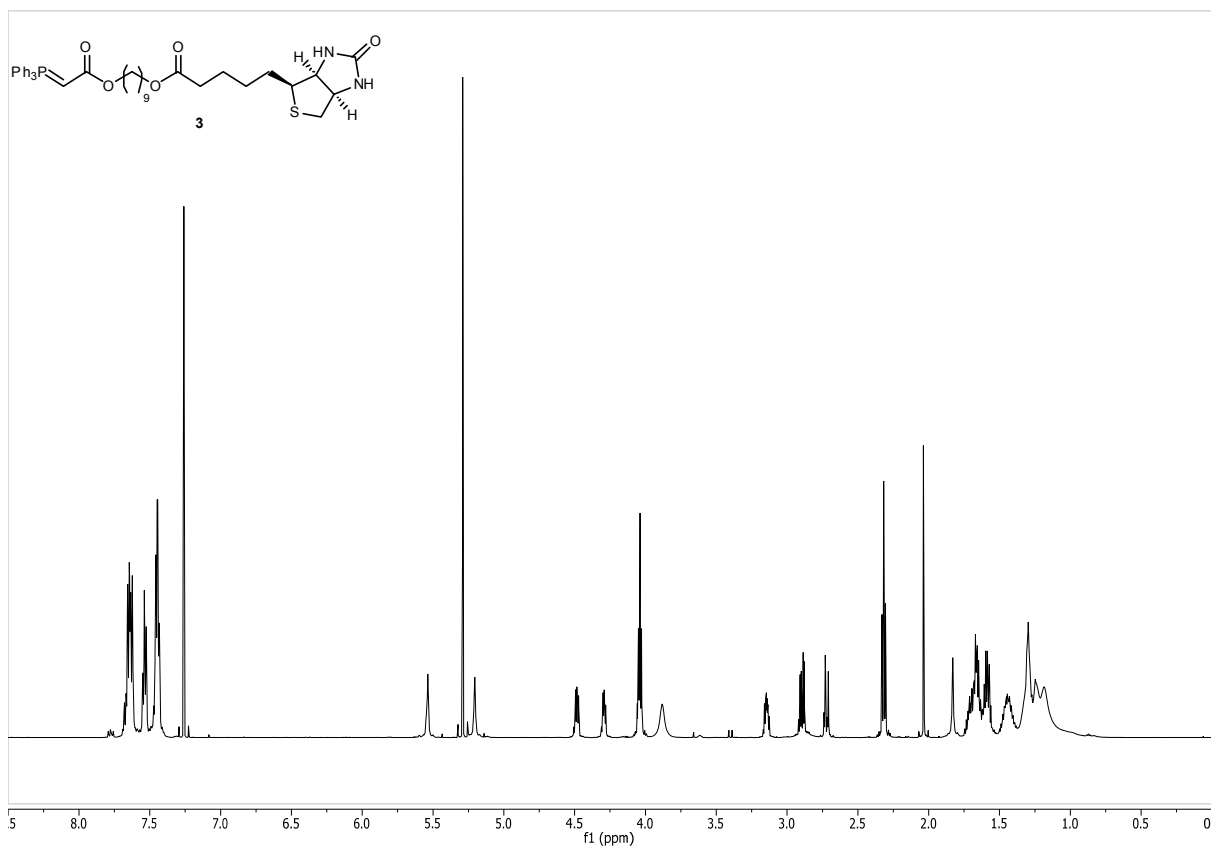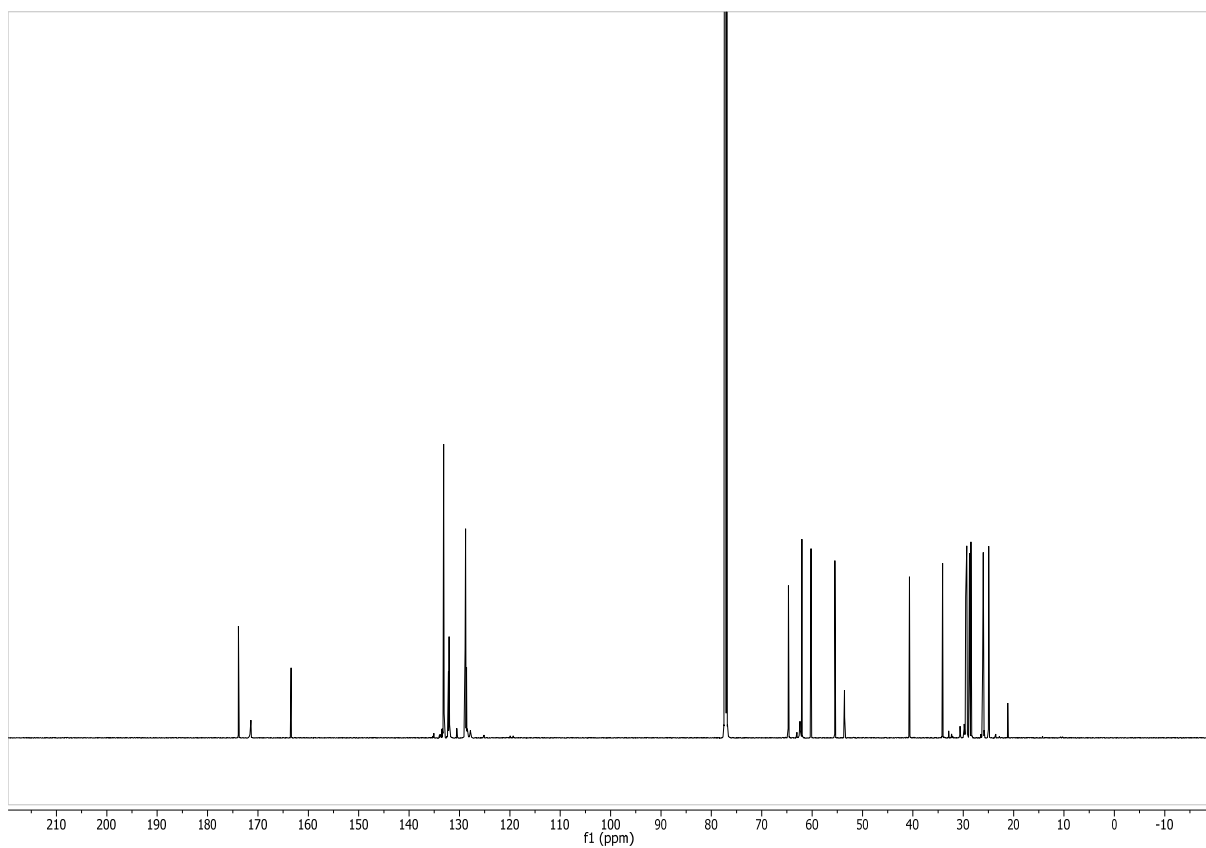

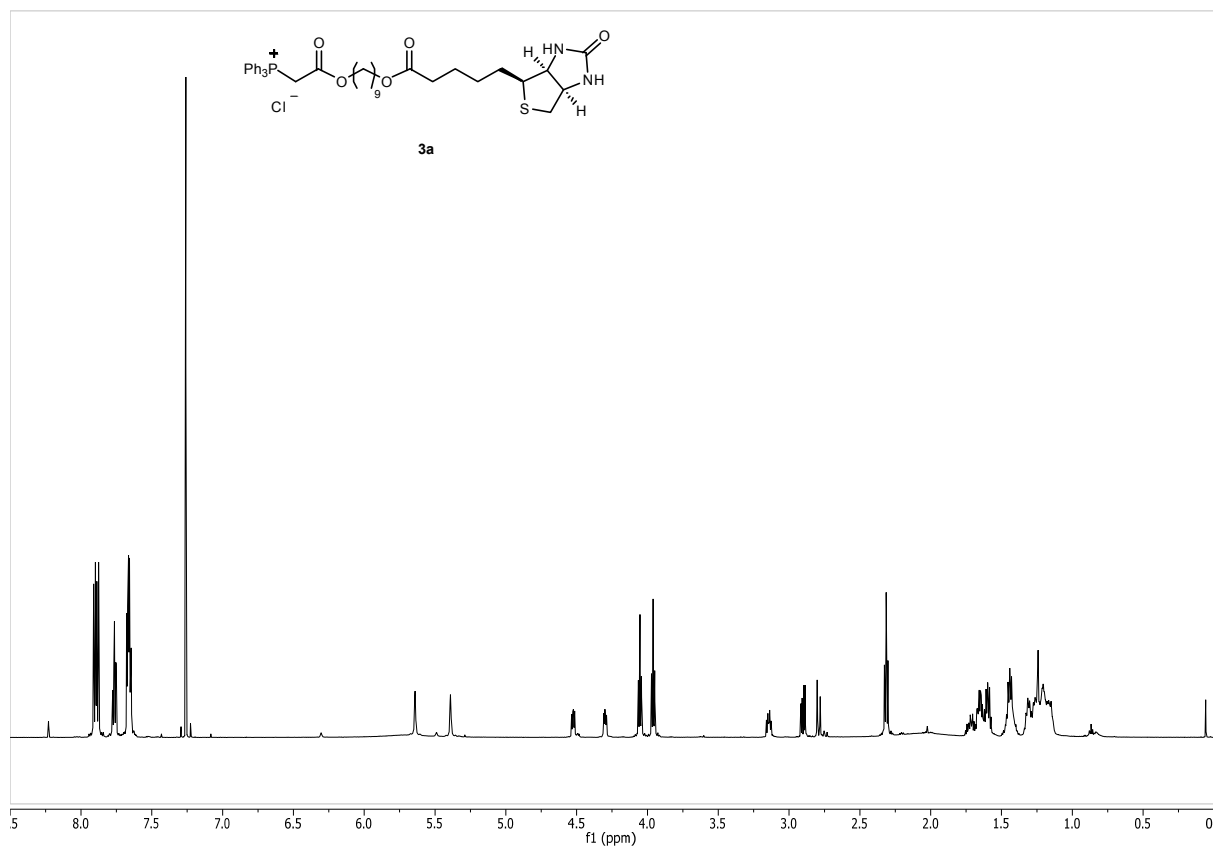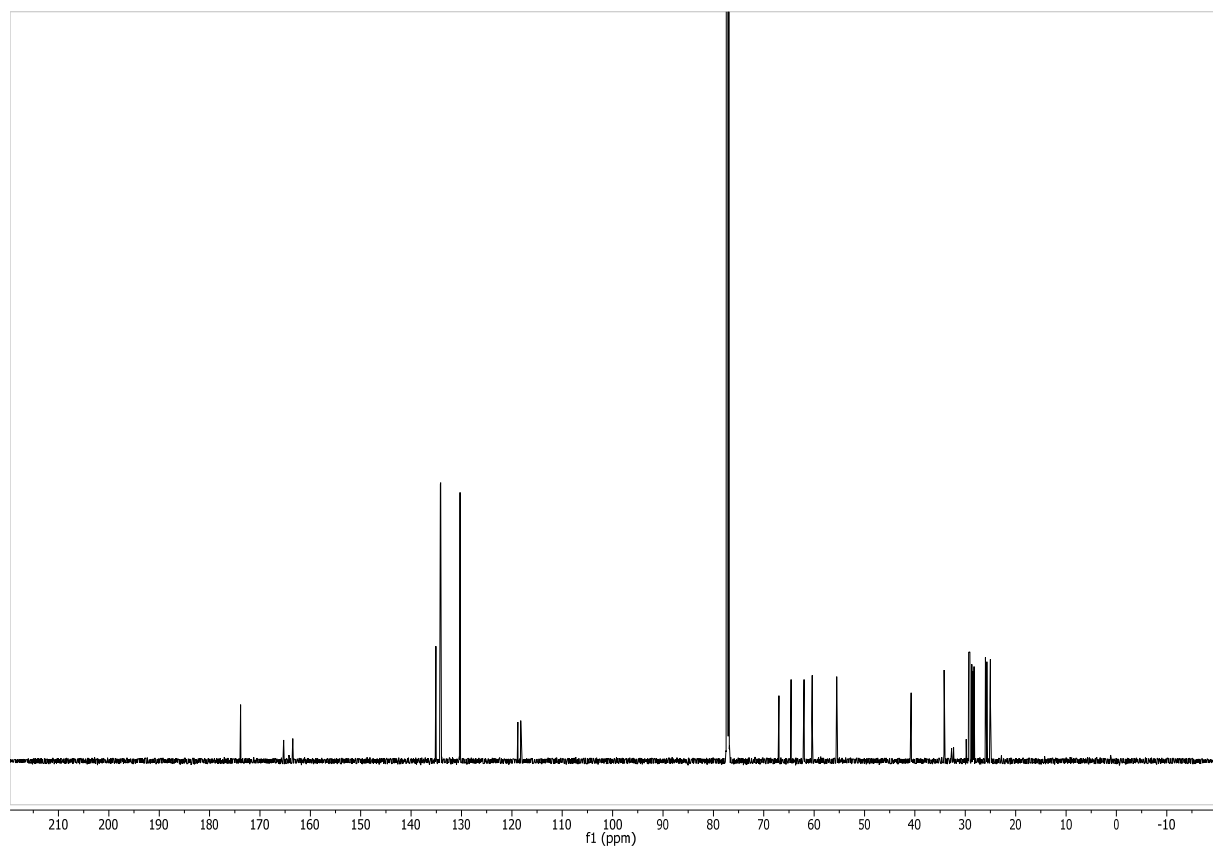

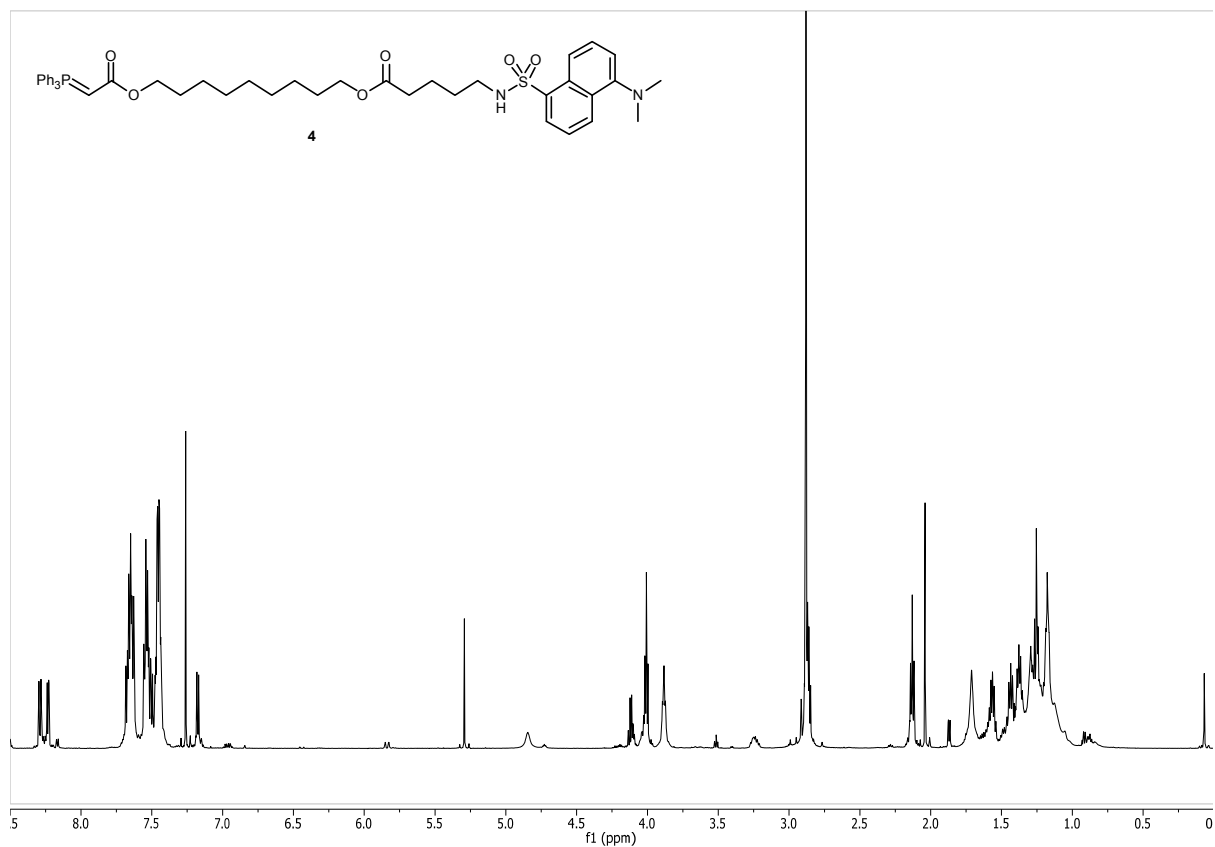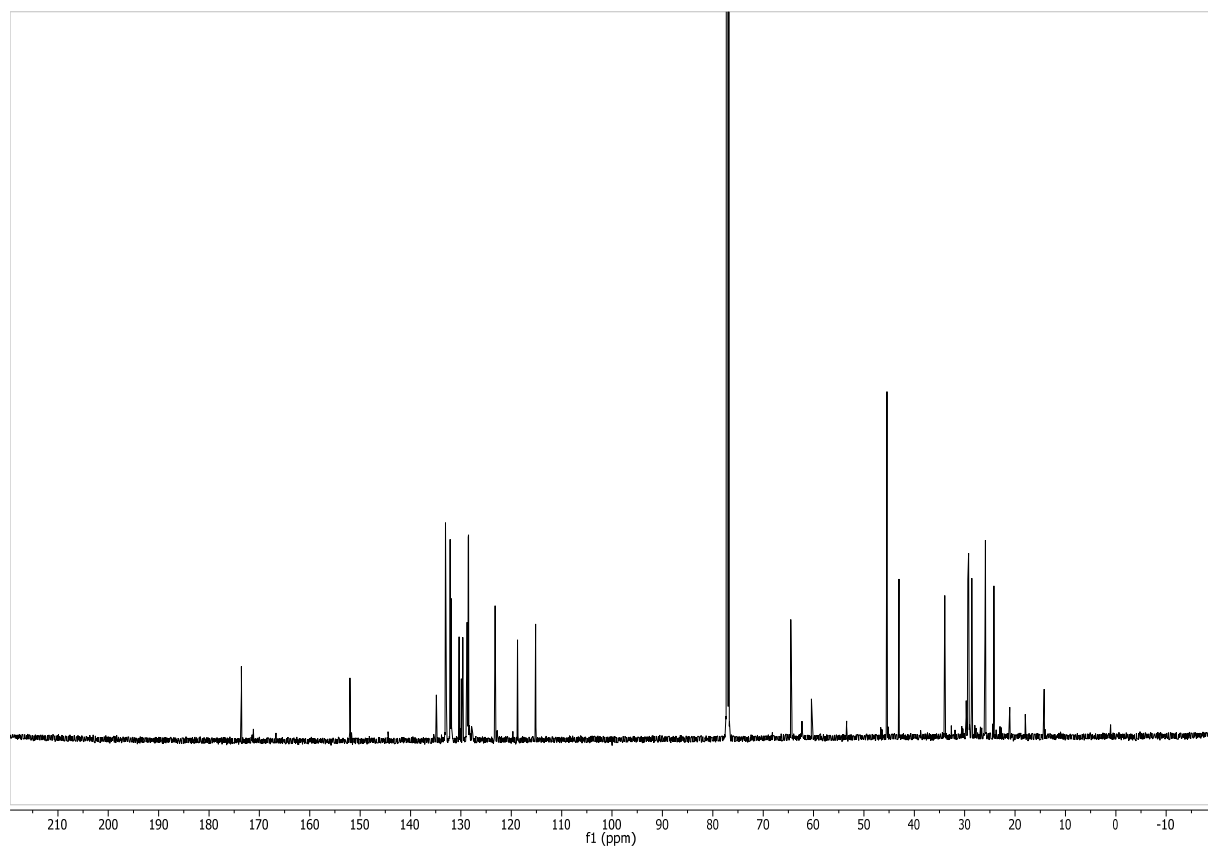

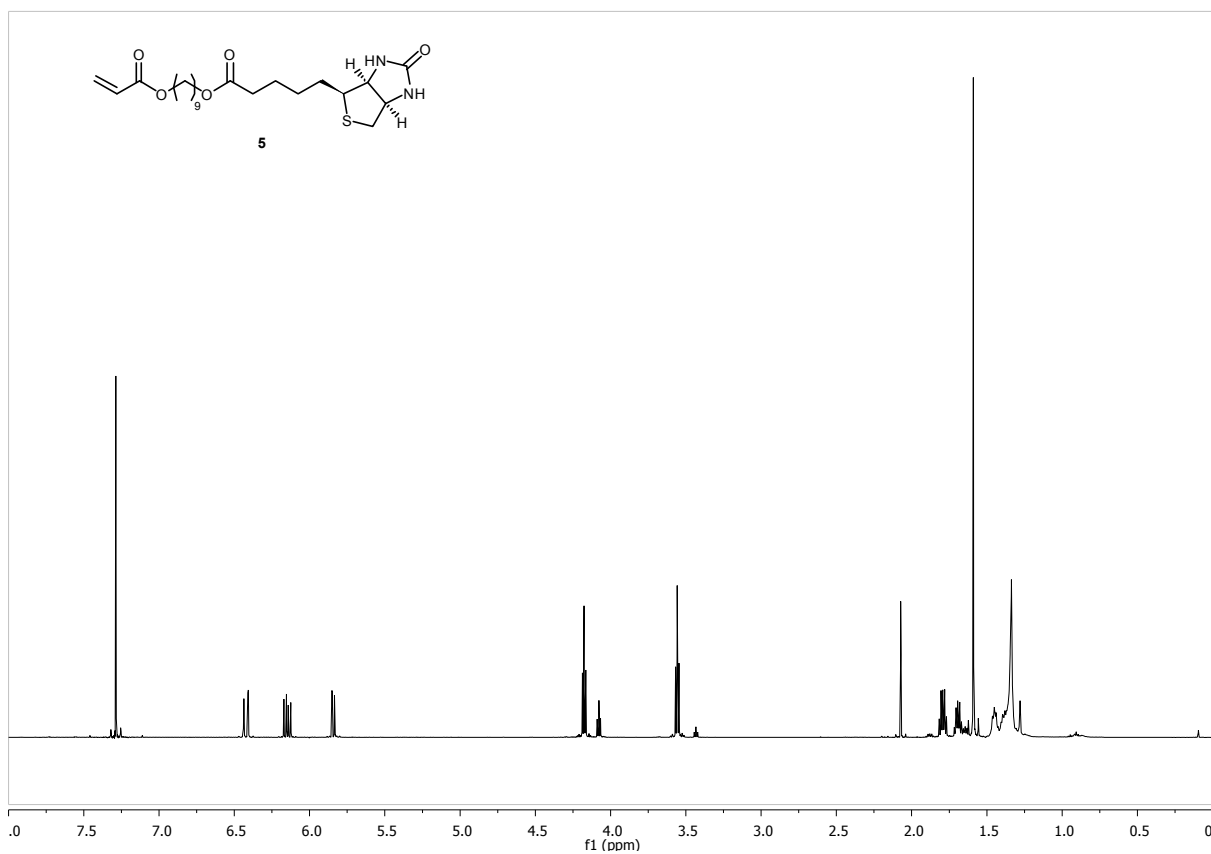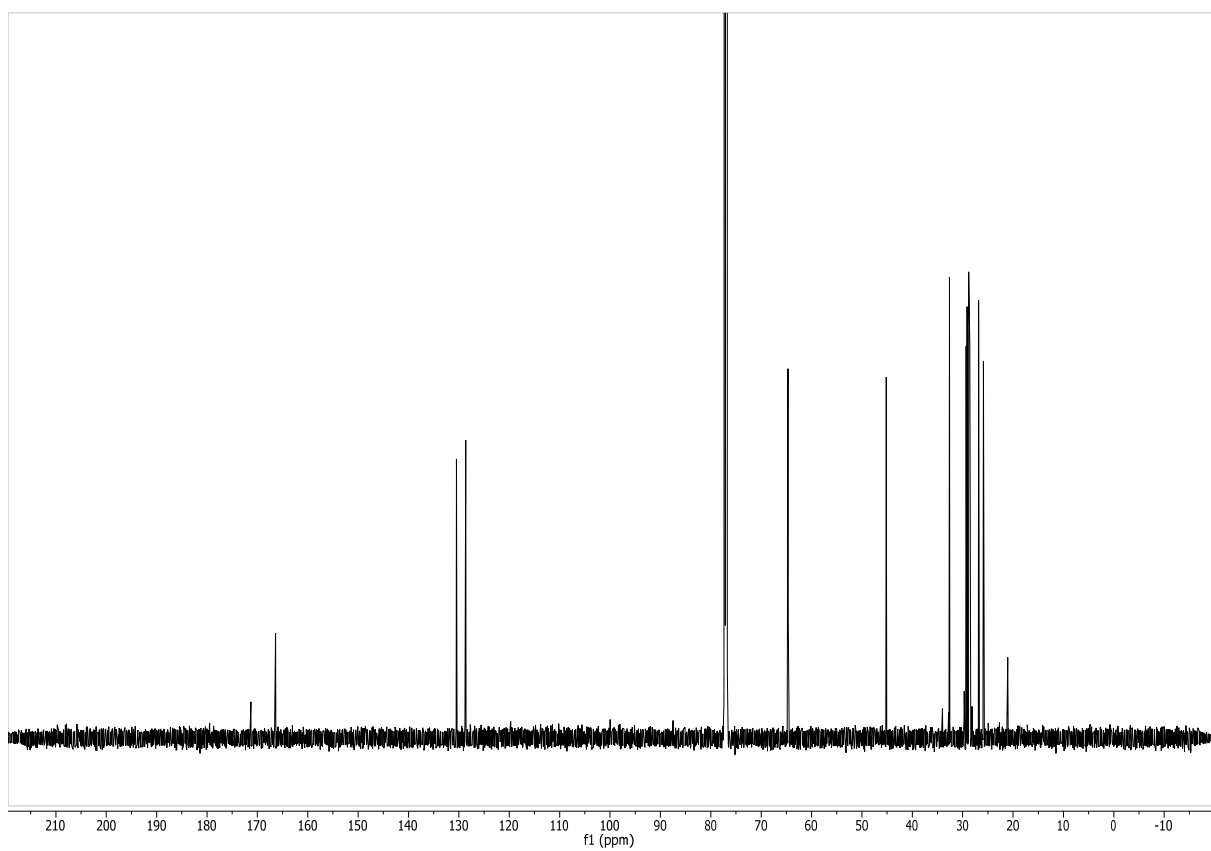

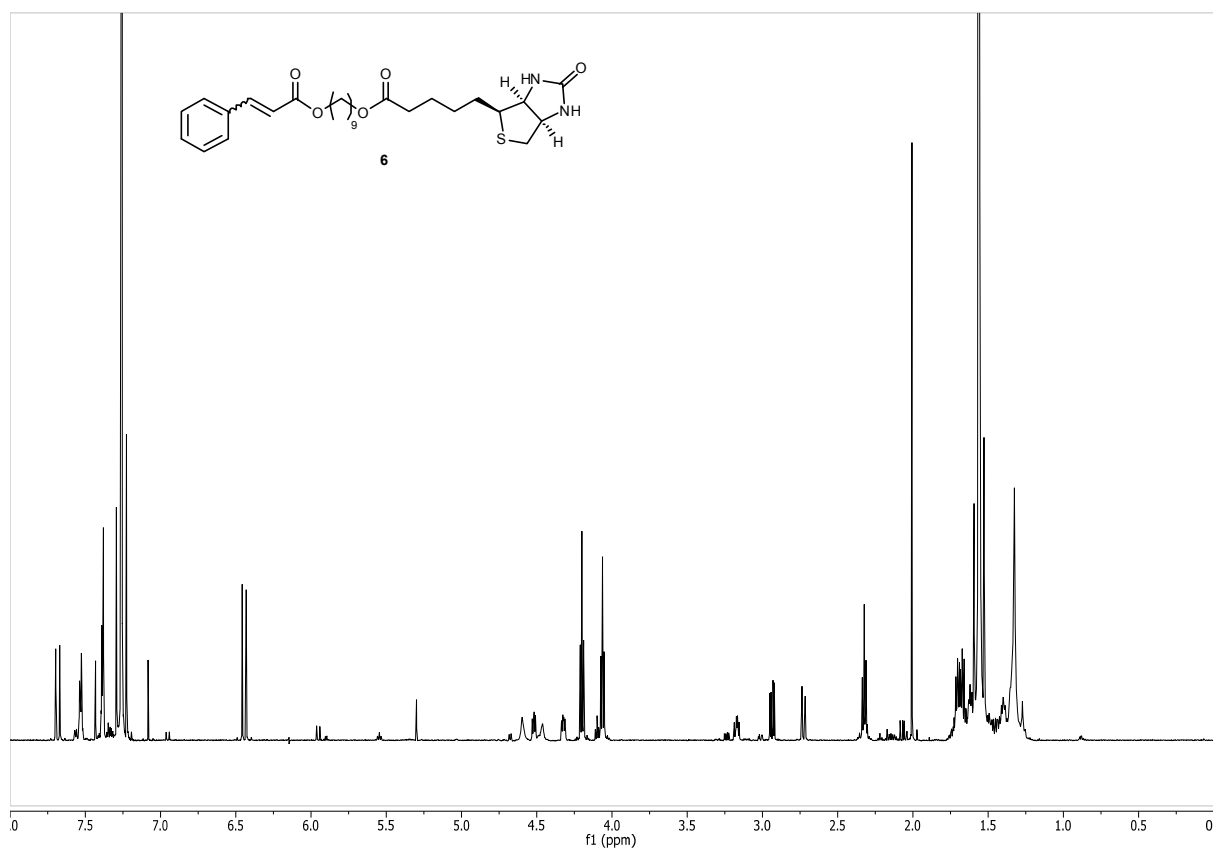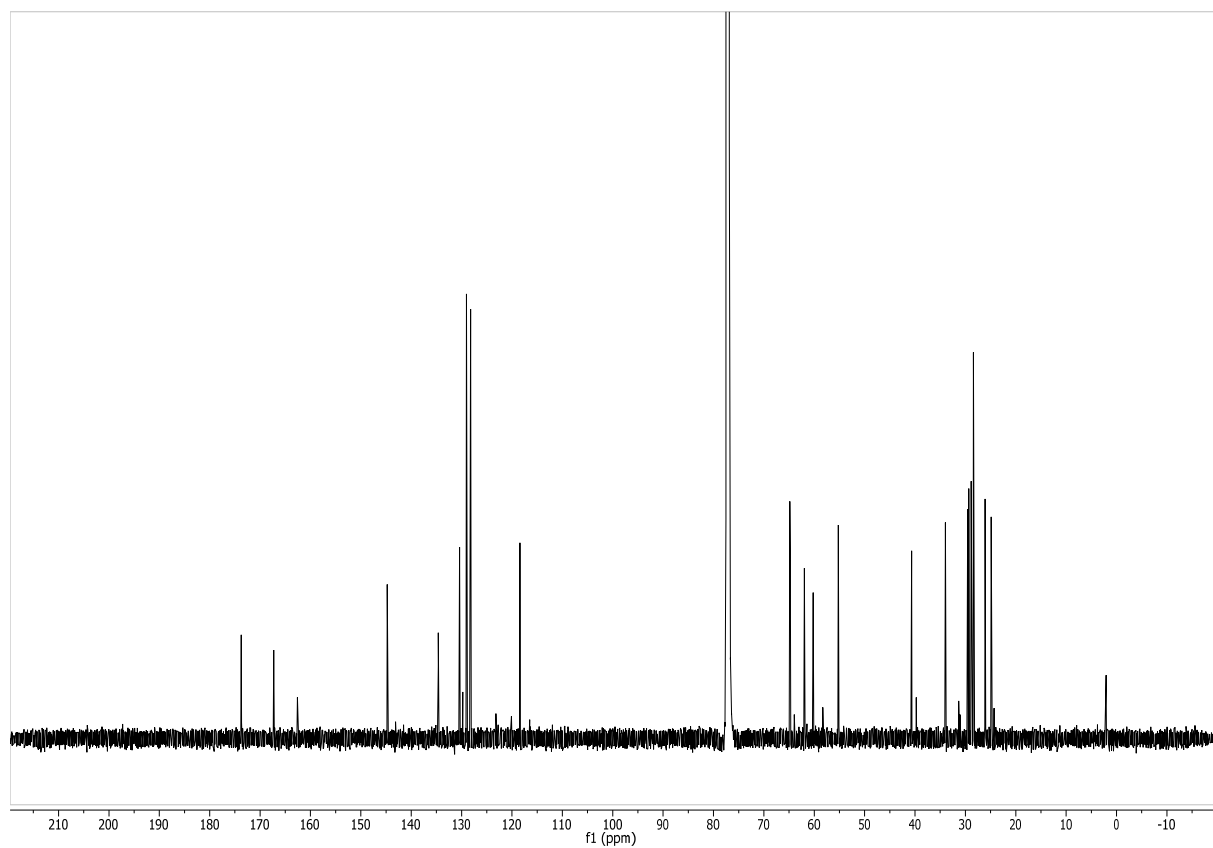



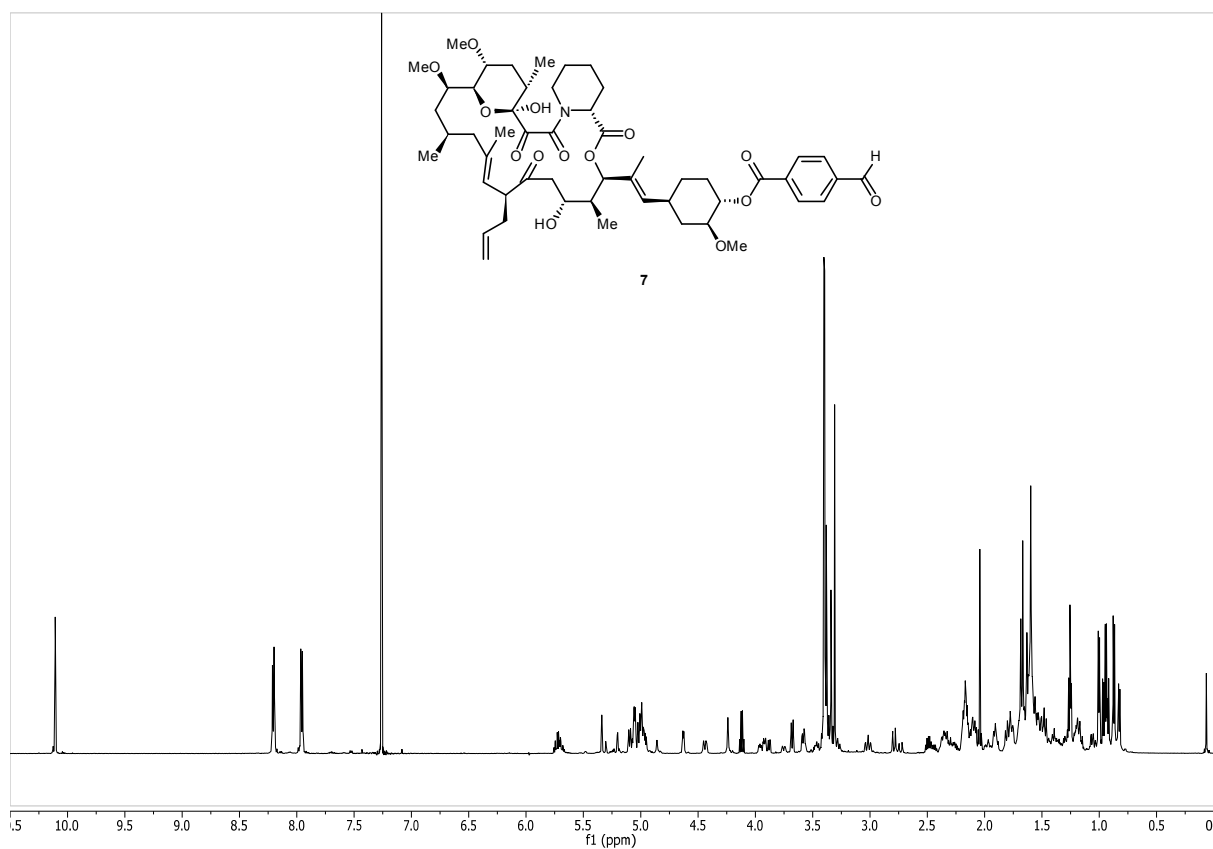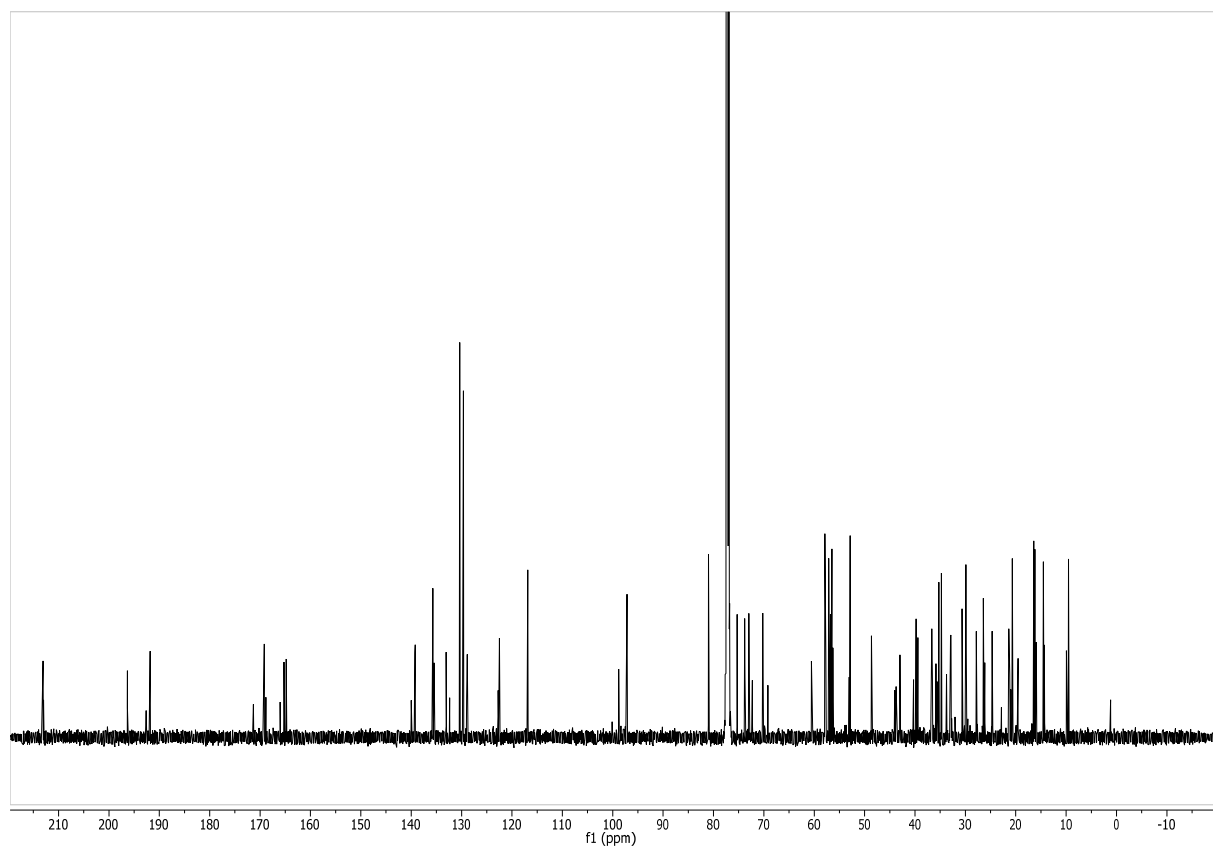

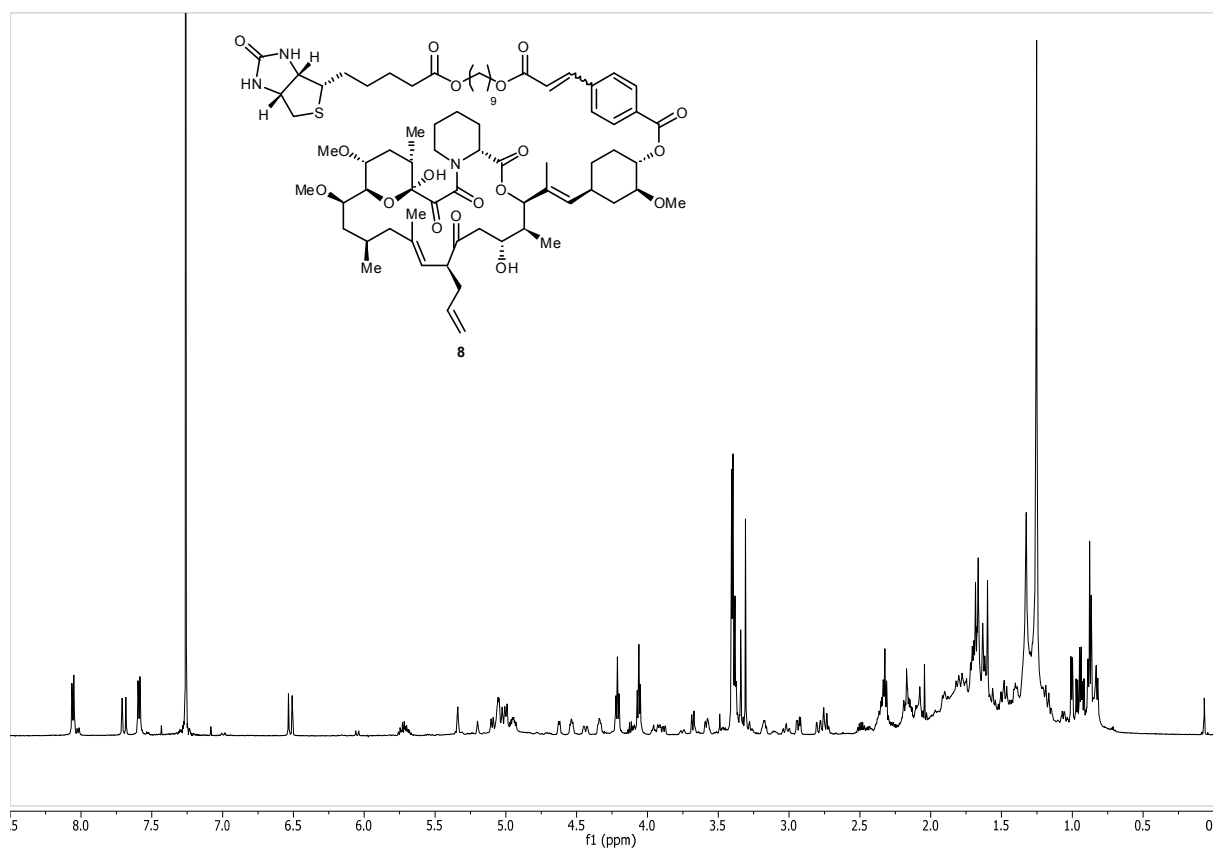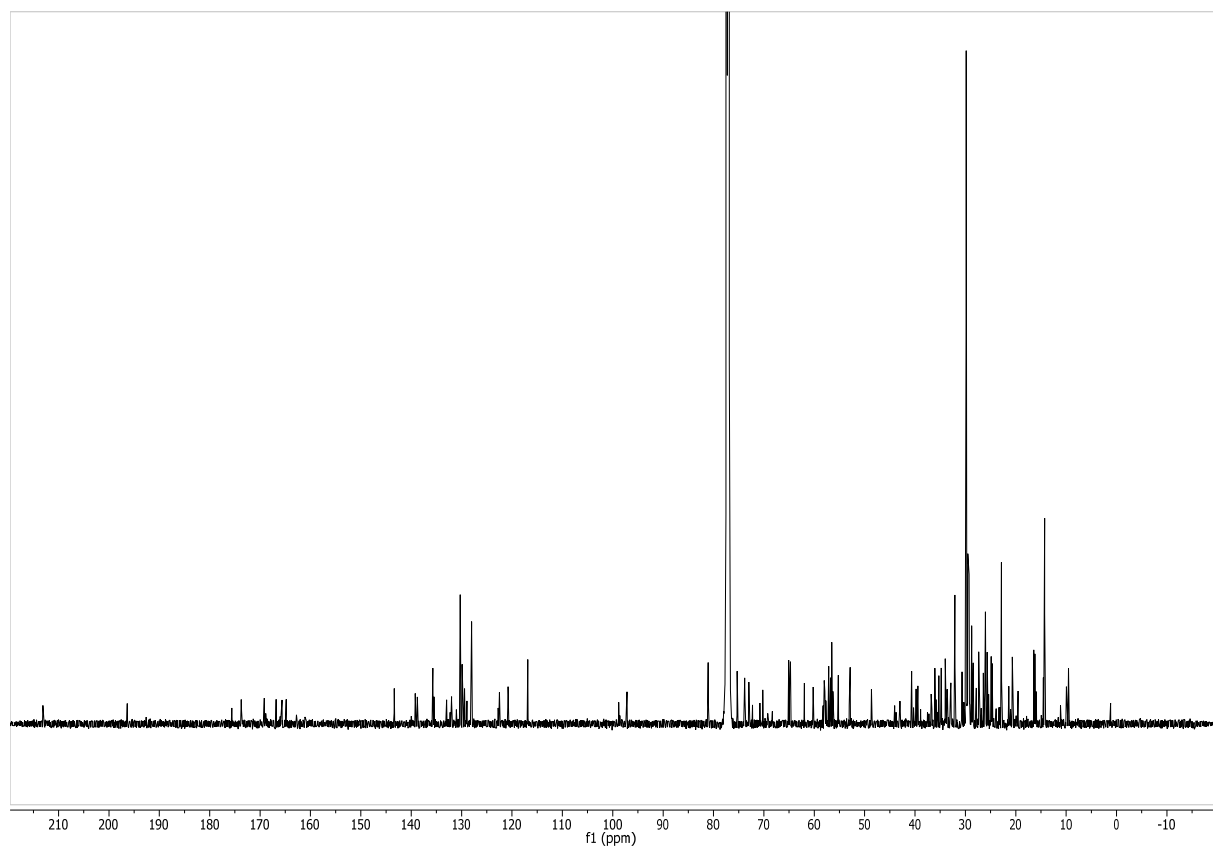

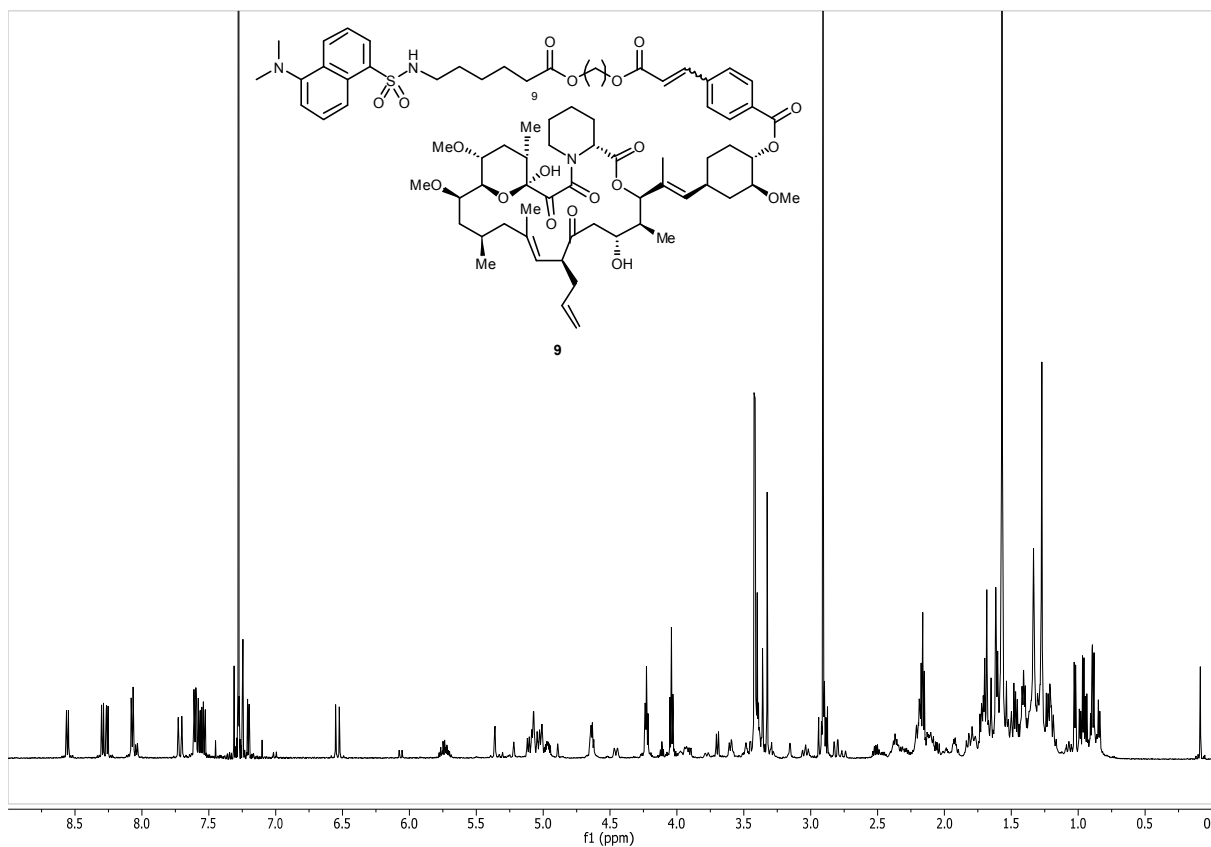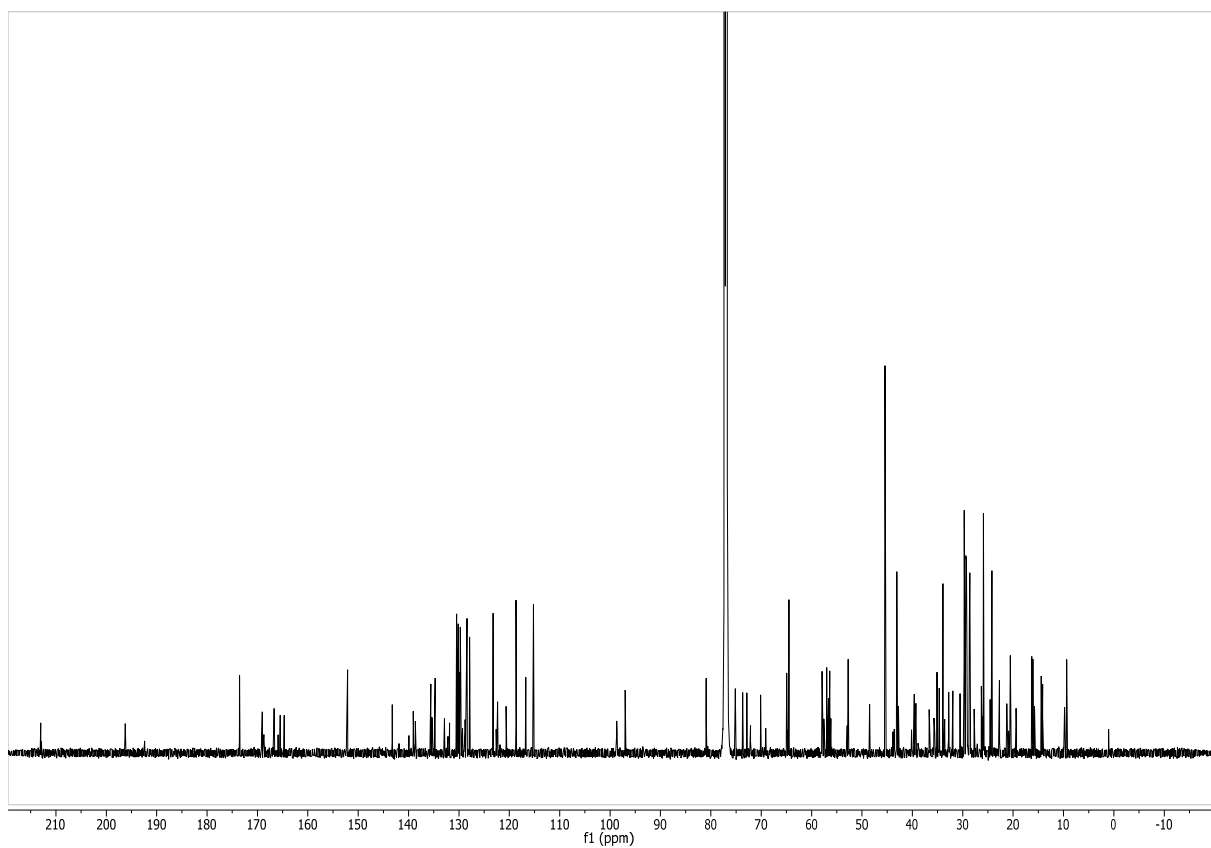

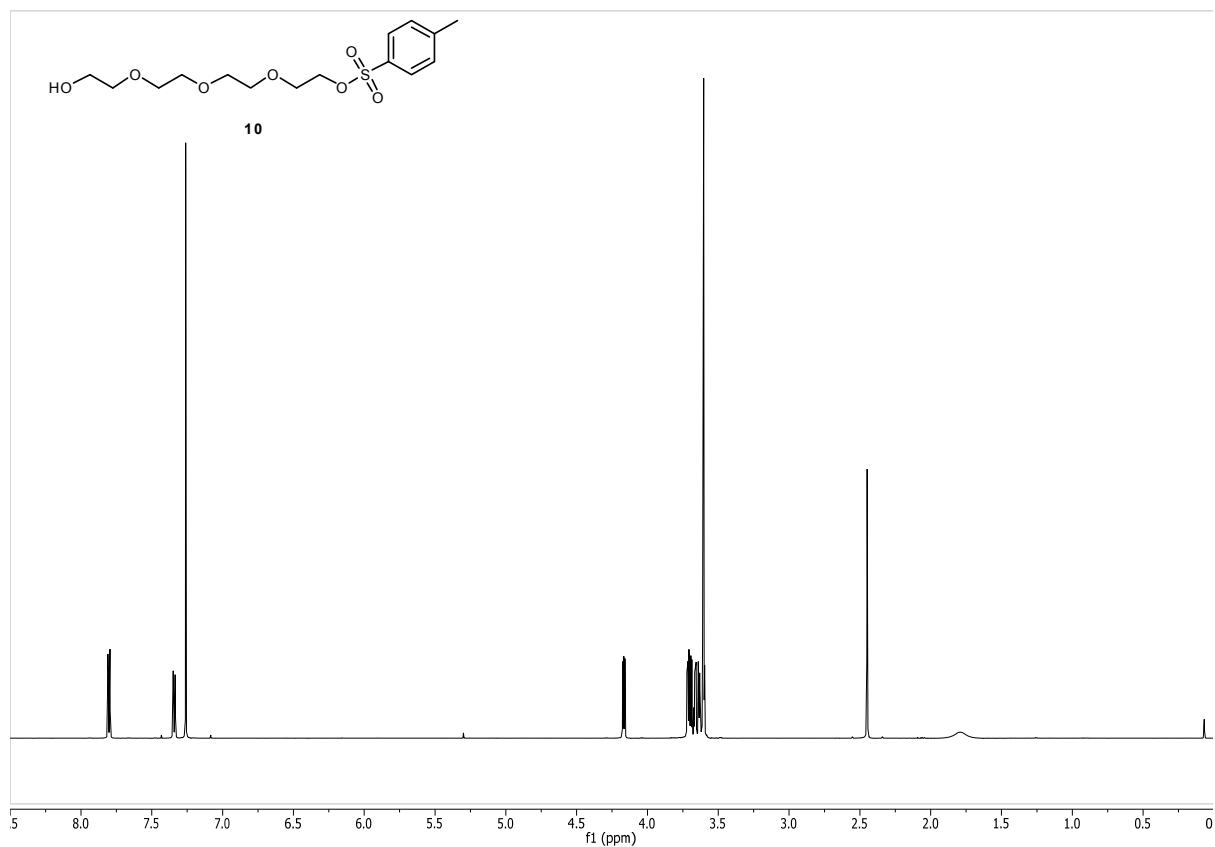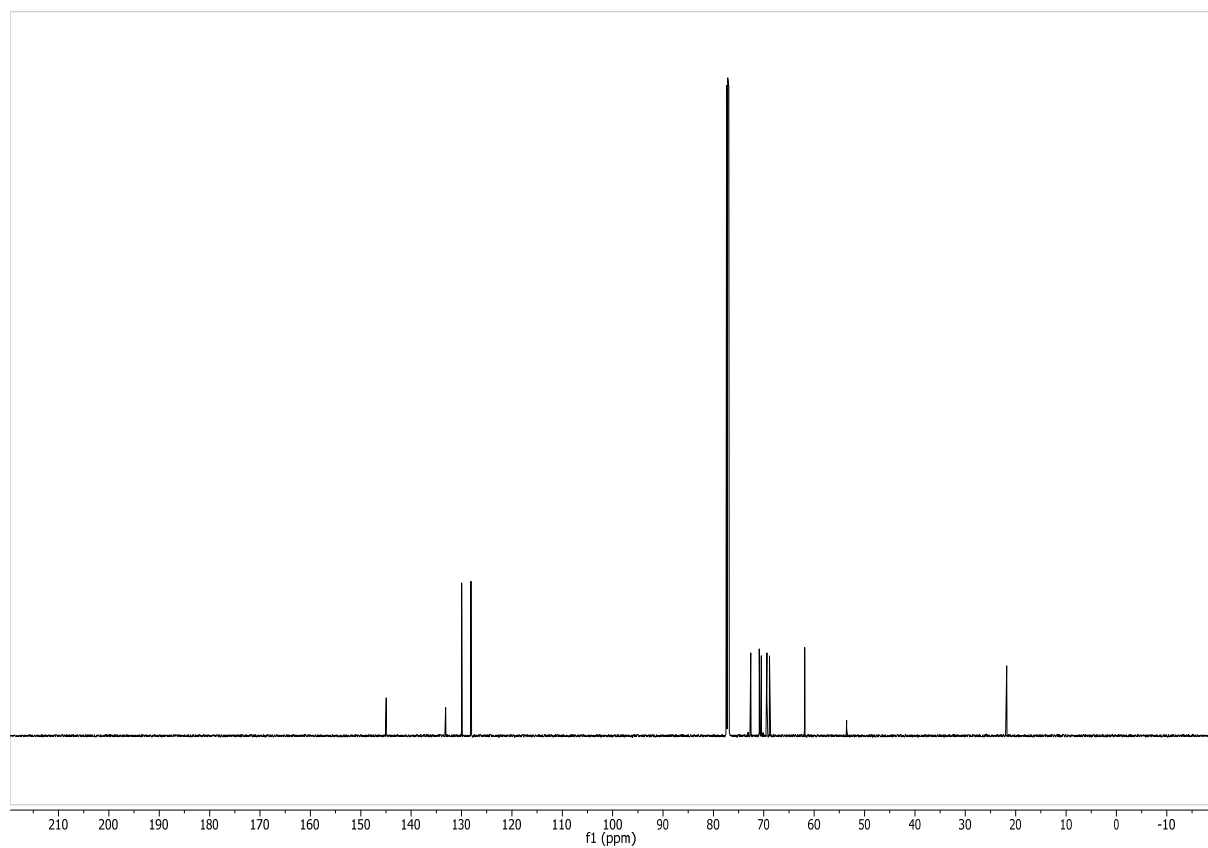

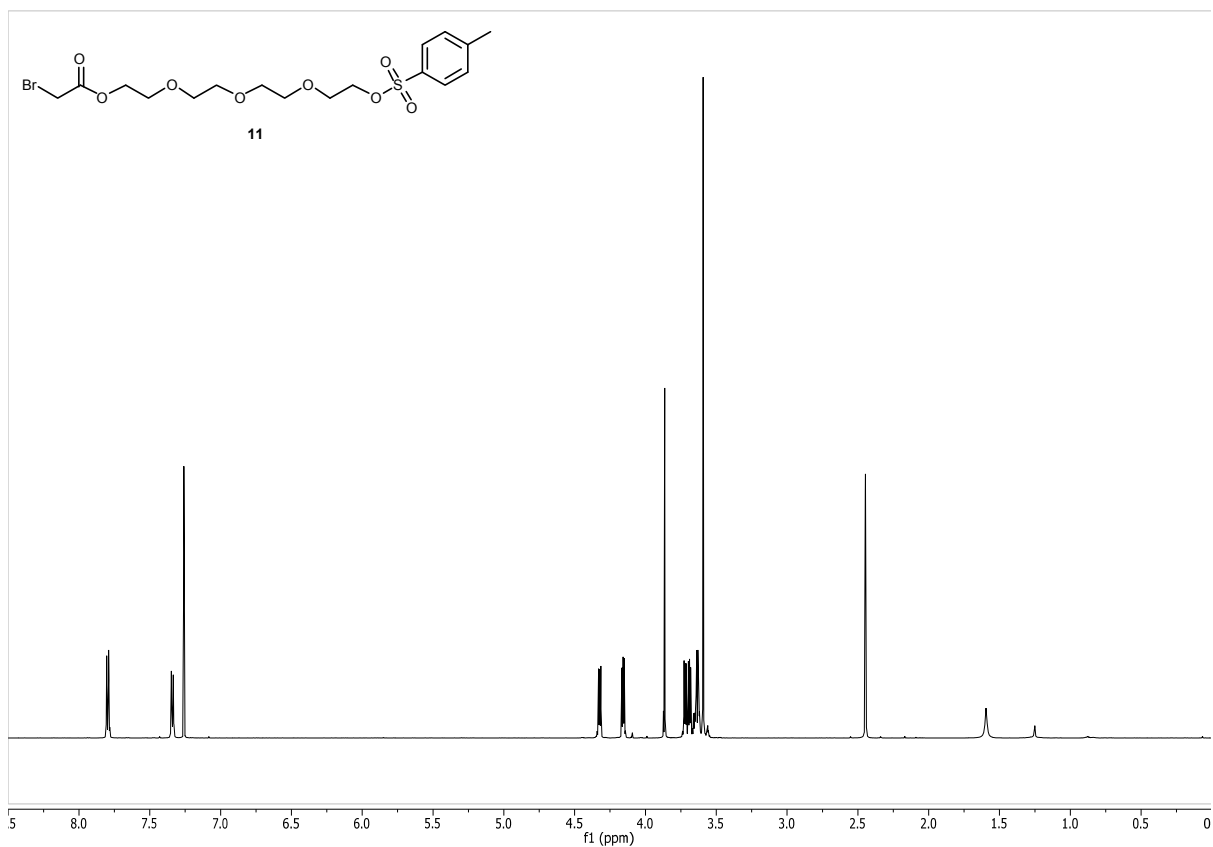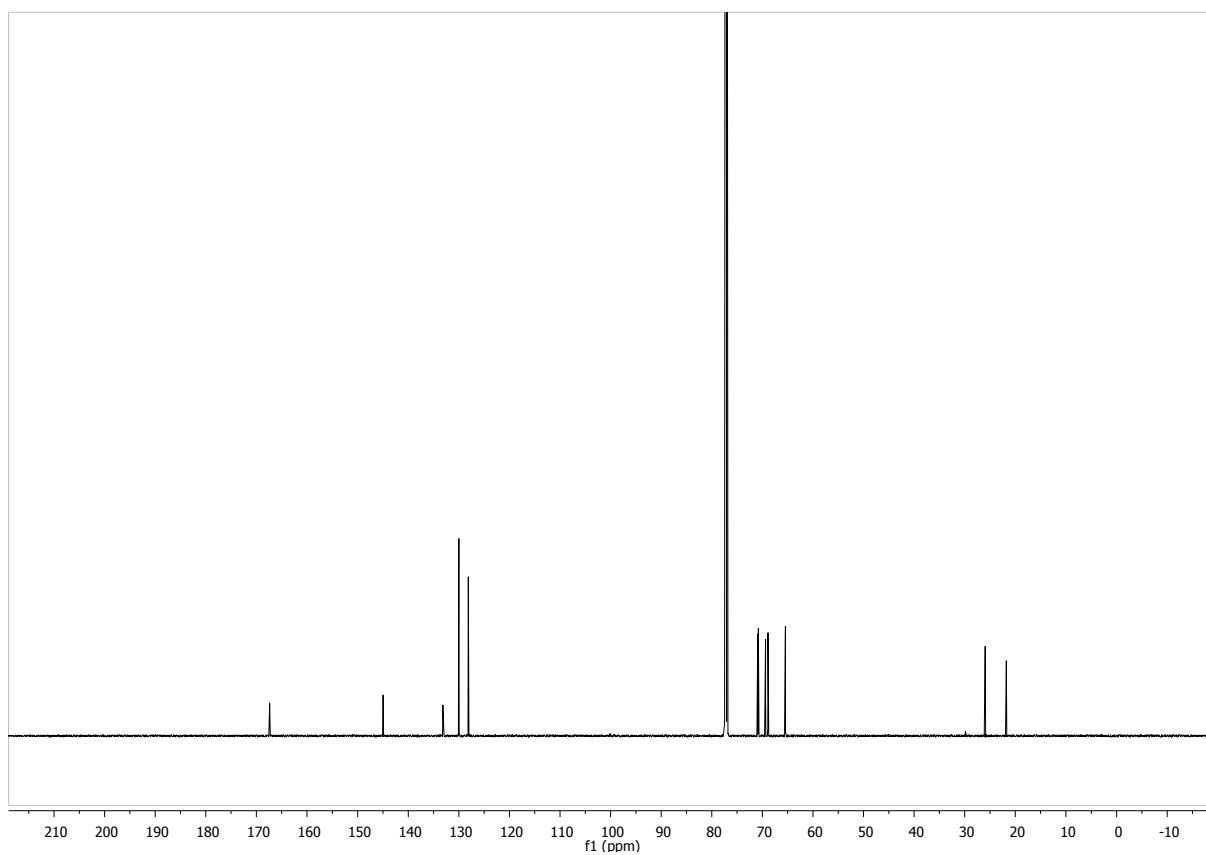

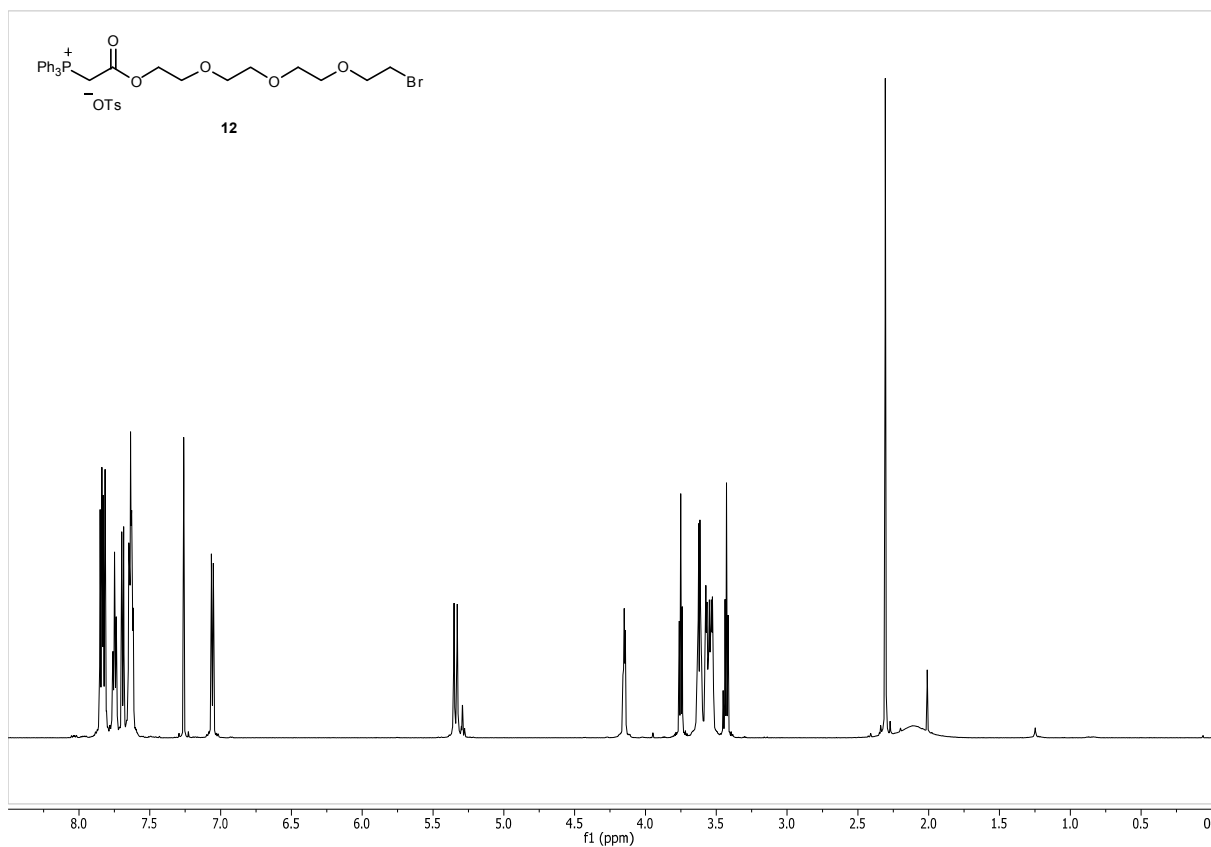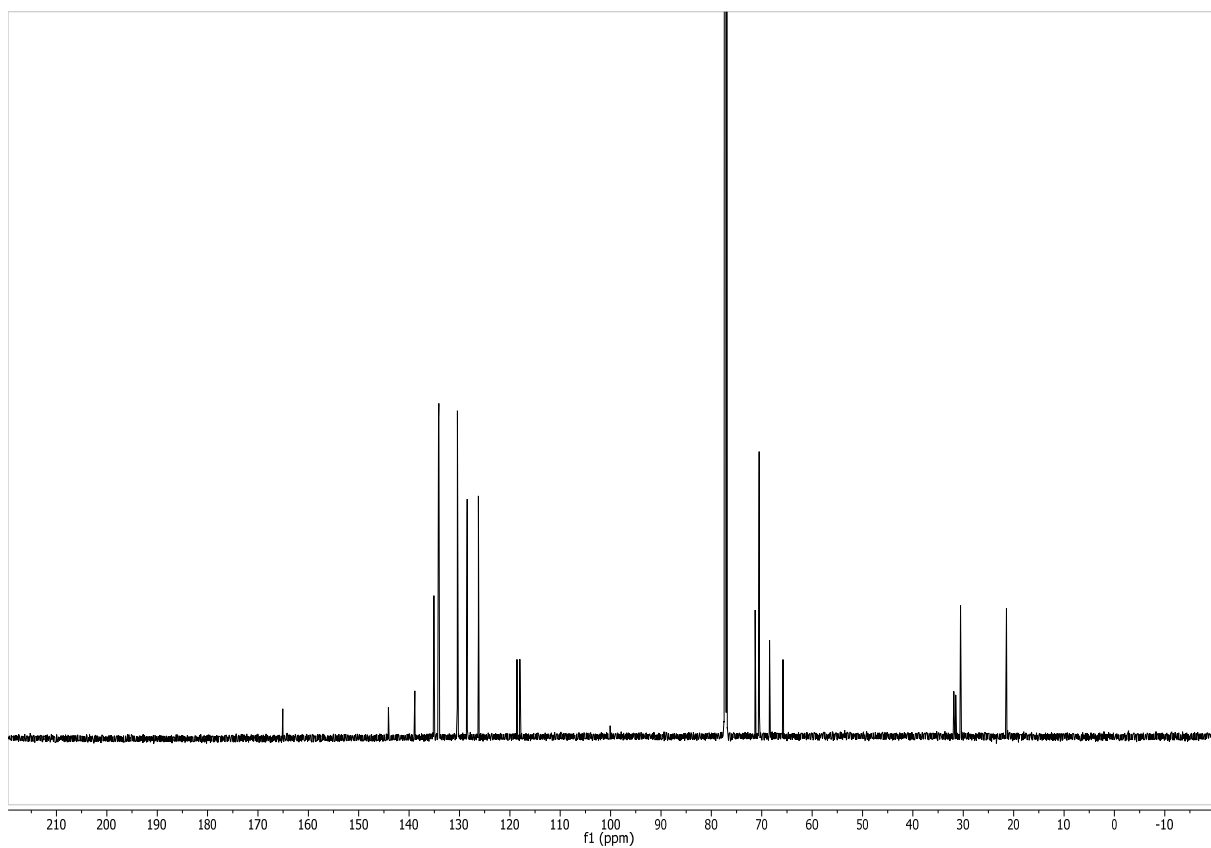

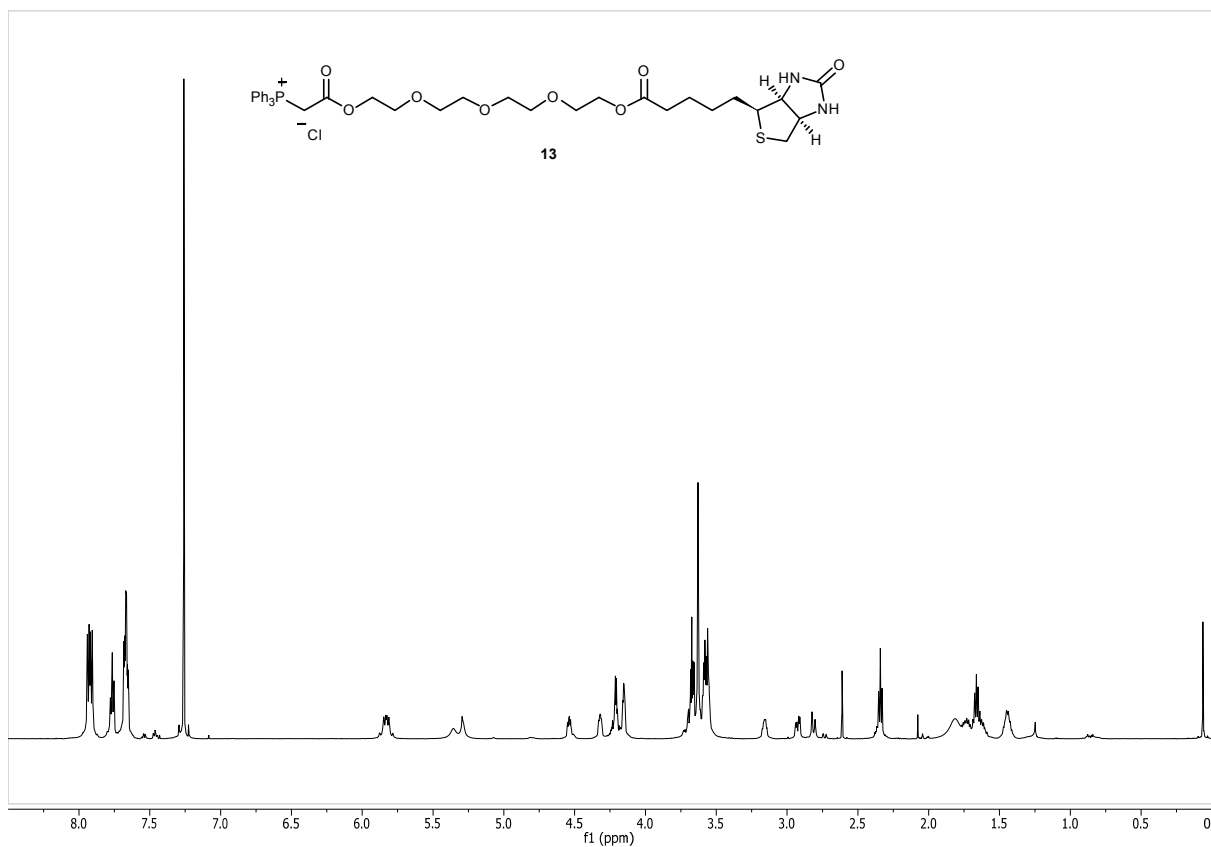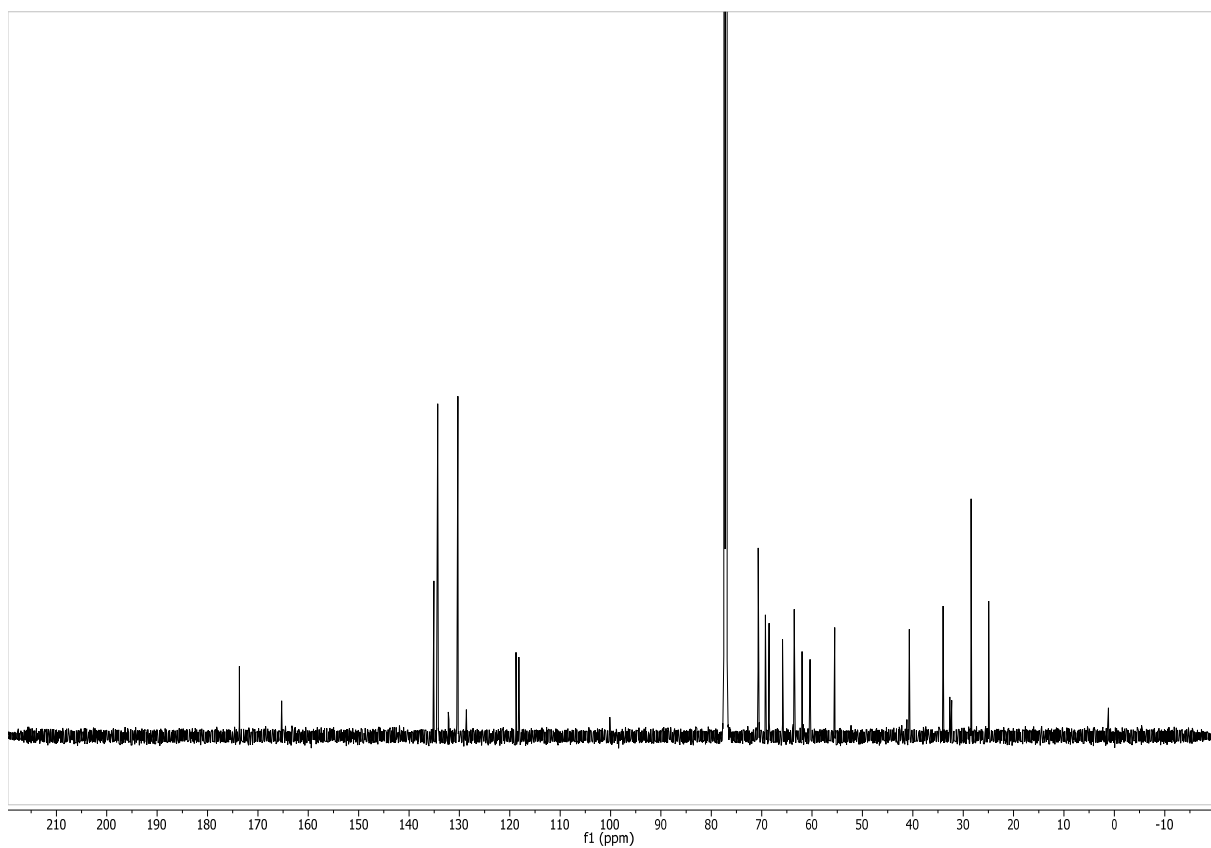

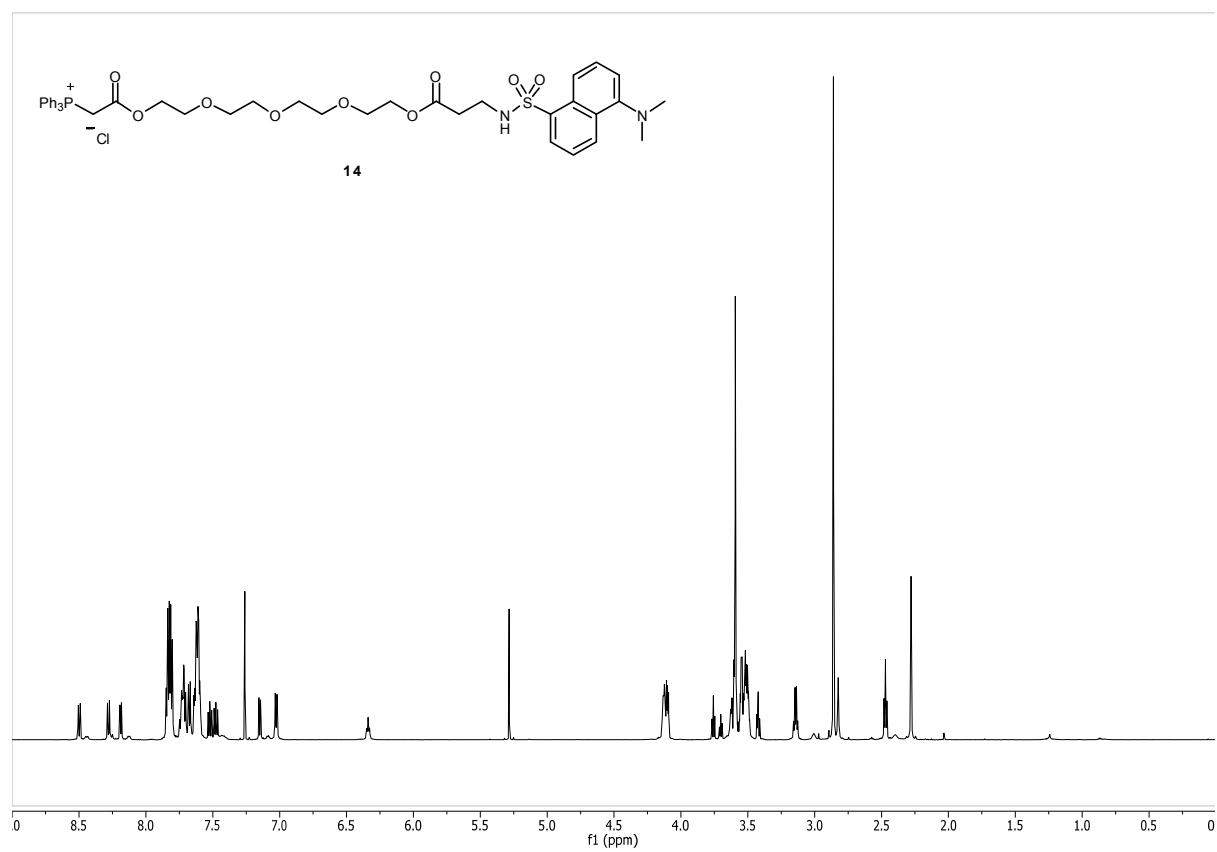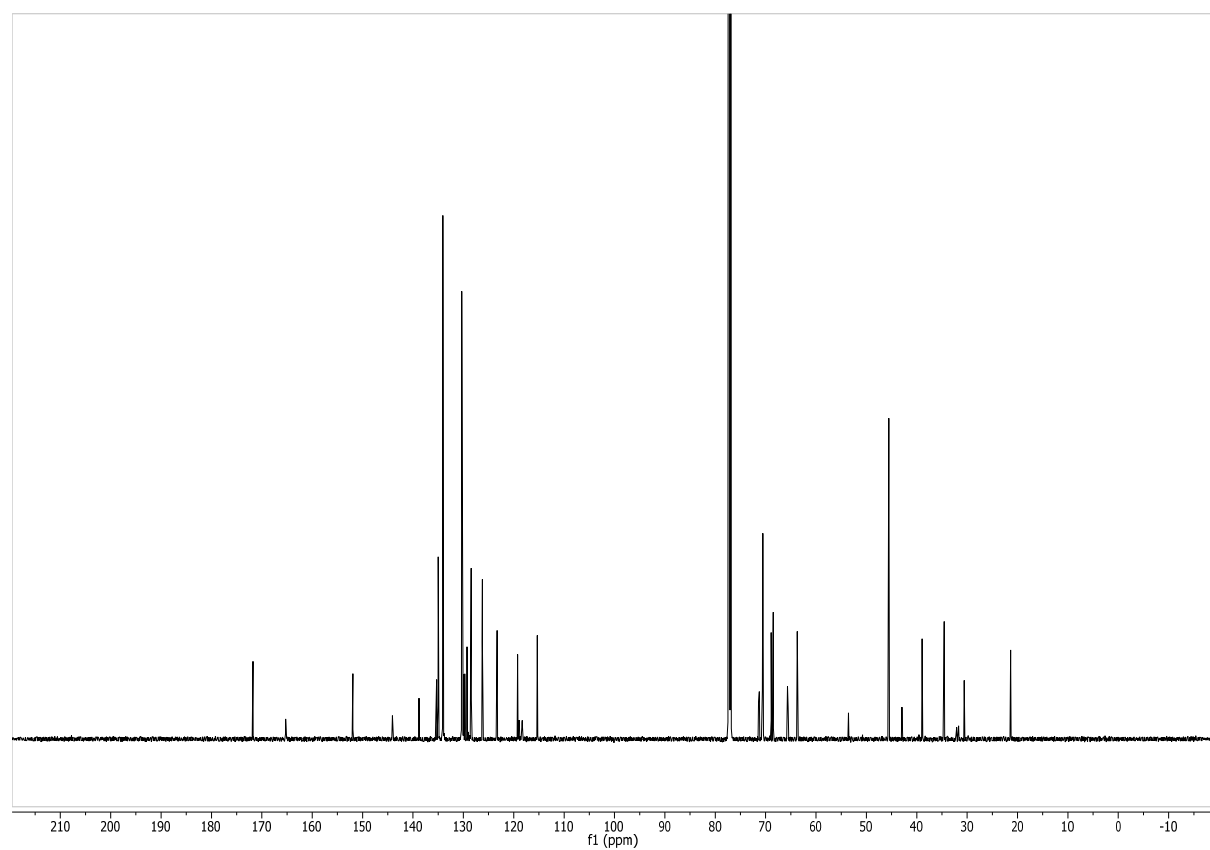



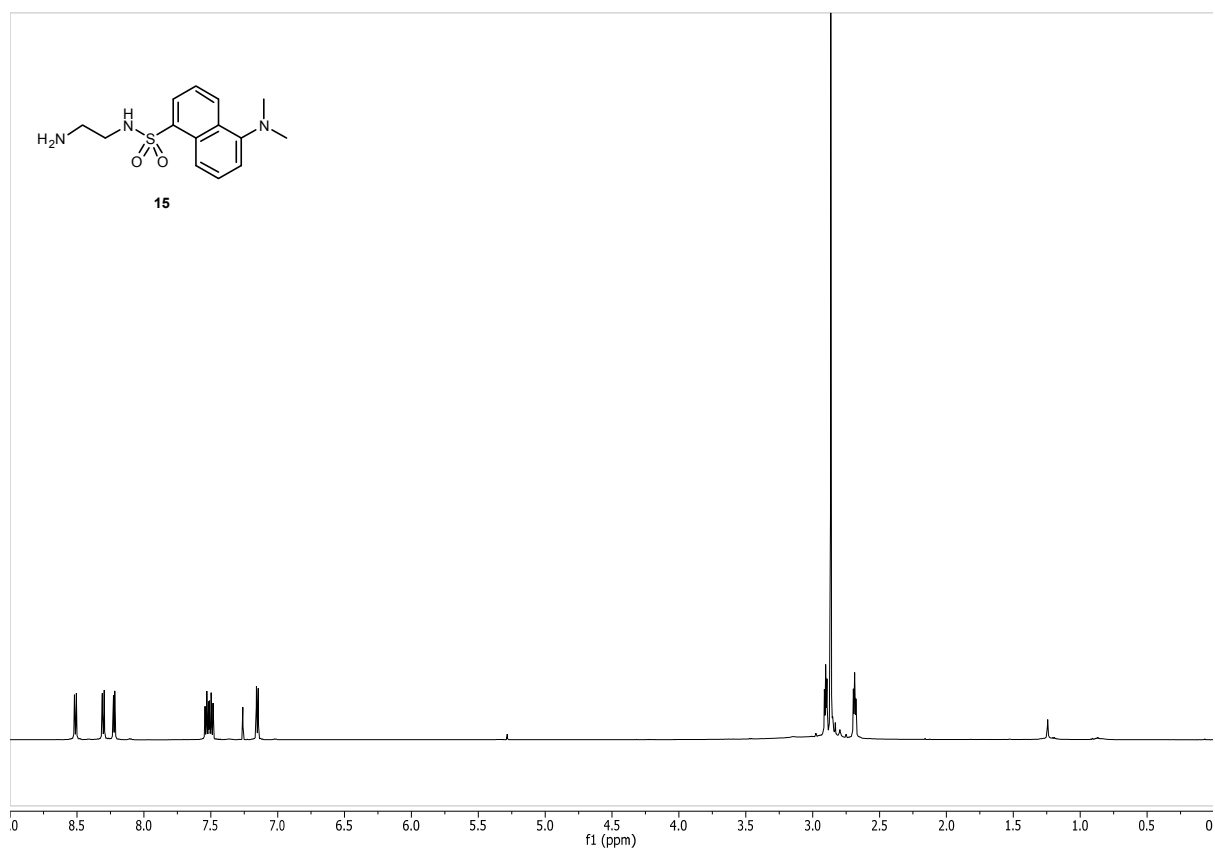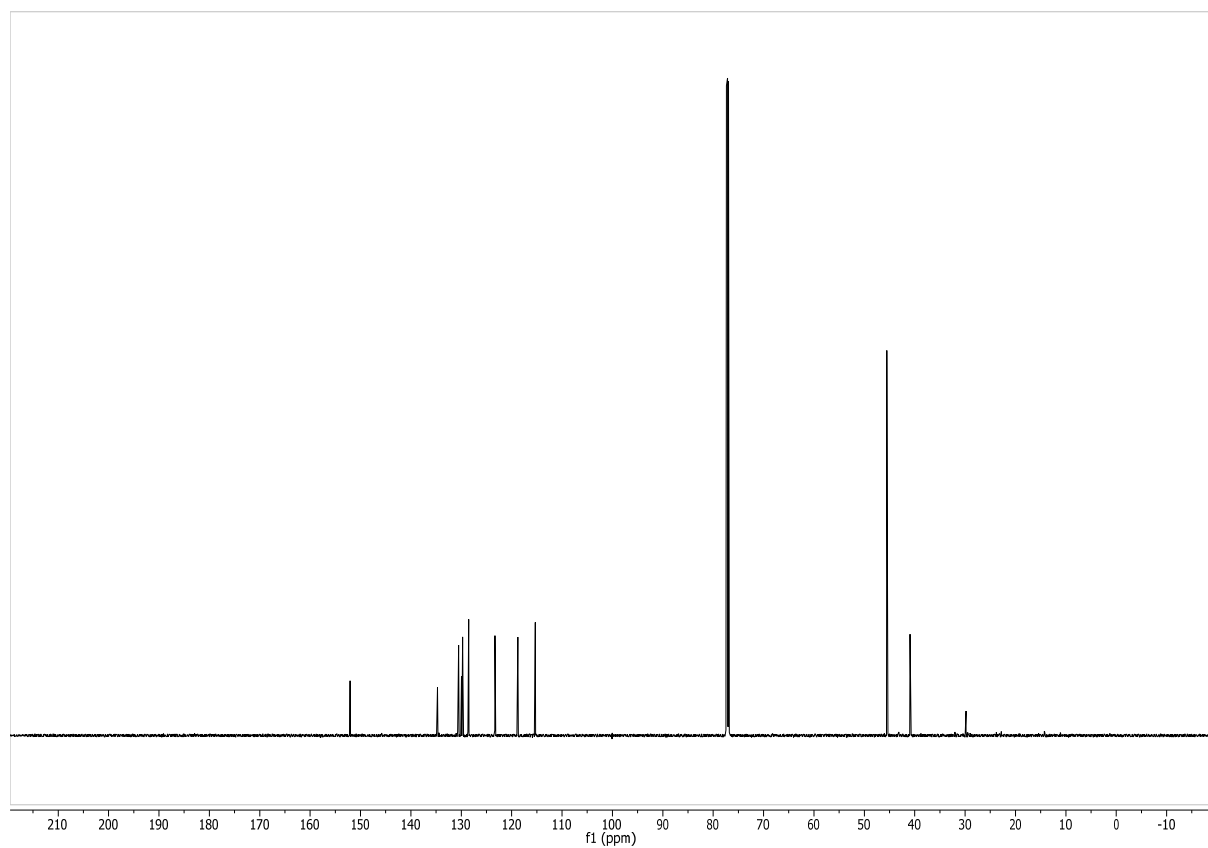

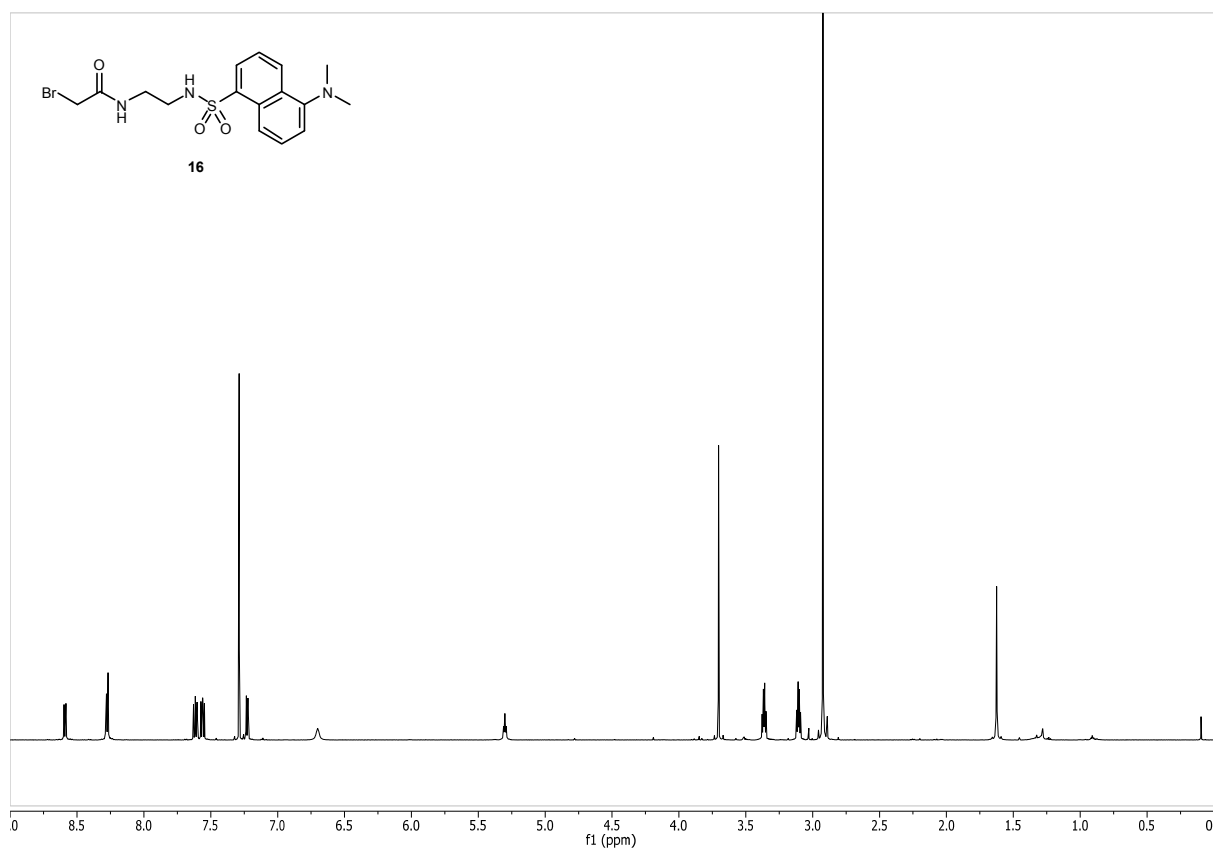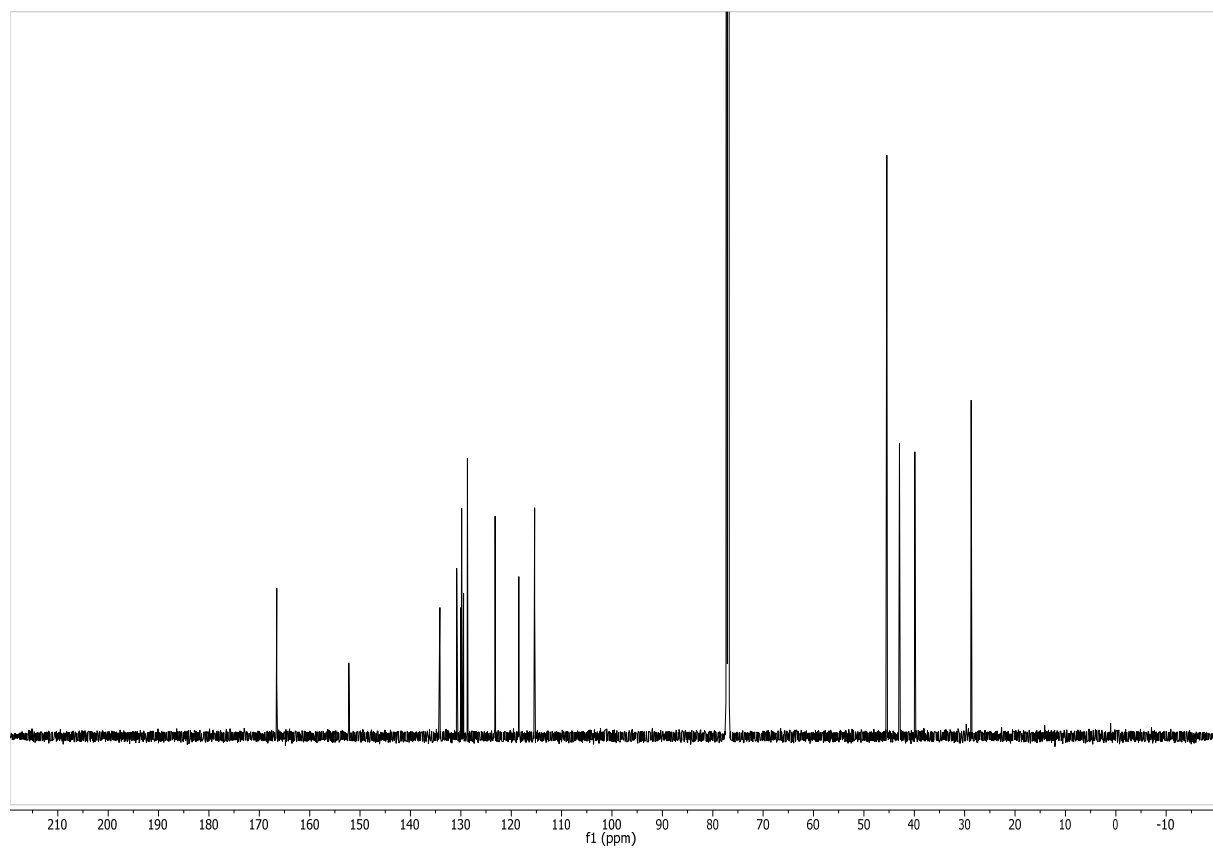

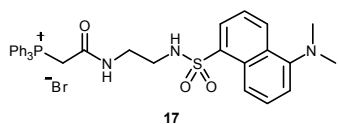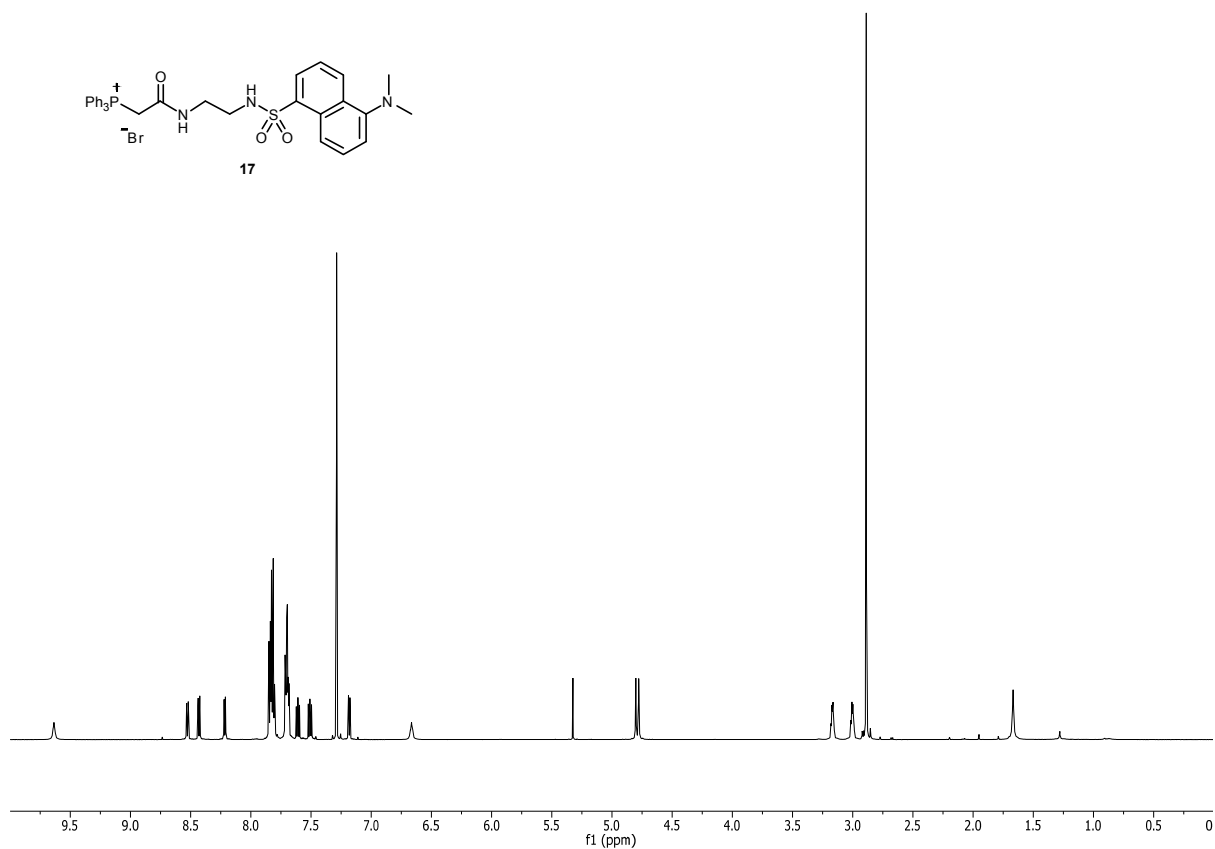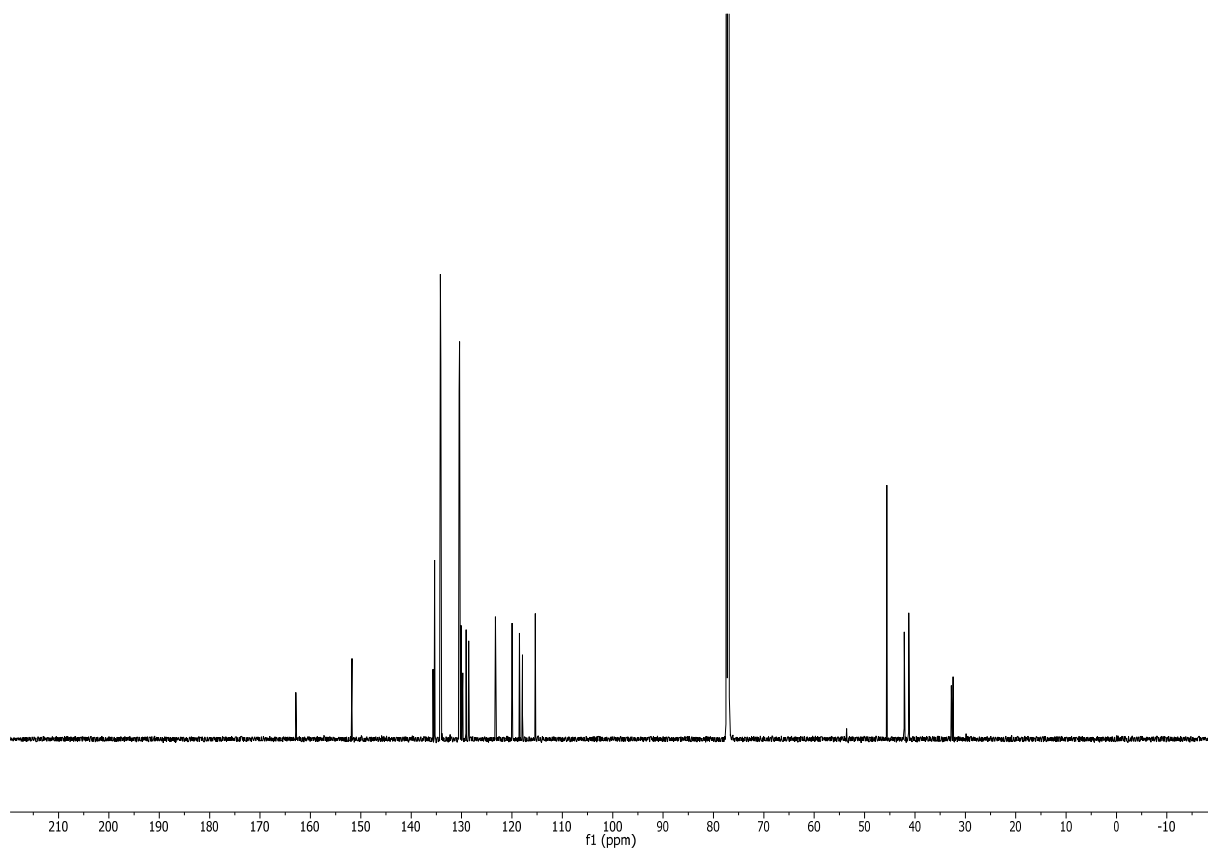

Supplement: c3cc45961f.pdf [file c3cc45961f.pdf]
